# Supplementary material for: Chiral Sc-catalyzed asymmetric Michael reactions of thiols with enones in water
Source: Royal Society of Chemistry journal article supplement (doi:10.1039/c1ob05424d), 2011-01-01
Supplement: c1ob05424d.pdf [file c1ob05424d.pdf]

**Chiral Sc-catalyzed Asymmetric Michael Reactions of Thiols with  
Enones in Water**

Masaharu Ueno, Taku Kitanosono, Masaru Sakai, and Shū Kobayashi\*

Department of Chemistry, School of Science and Graduate School of Pharmaceutical  
Sciences, The University of Tokyo, Hongo, Bunkyo-ku, Tokyo 113-0033, Japan

**Electronic Supplementary Information**

## General

Nuclear magnetic Resonance (NMR) spectra were recorded on a JEOL ECX-600 or ECX-500 spectrometer, operating at 600 MHz or 500 MHz for  $^1\text{H}$  and 150 MHz or 125 MHz for  $^{13}\text{C}$  NMR in  $\text{CDCl}_3$  unless otherwise noted. Tetramethylsilane (TMS) served as the internal standard ( $\delta = 0$ ) for  $^1\text{H}$  NMR and  $\text{CDCl}_3$  was used as the internal standard ( $\delta = 77.0$ ) for  $^{13}\text{C}$  NMR. Infrared (IR) spectra were obtained using a JASCO FT/IR-4200 spectrometer. Data are represented as frequency of absorption ( $\text{cm}^{-1}$ ). All melting points were determined on a YAZAWA micro melting point BY-1 apparatus and are uncorrected. High-performance liquid chromatography was carried out using following apparatuses; SHIMADZU LC-10ATvp (liquid chromatograph), SHIMADZU SPD-10A (UV detector) and SHIMADZU C-R8A (Chromatopac) using Daicel chiralpak<sup>®</sup> or chiralcel<sup>®</sup> columns. Preparative thin-layer chromatography (PTLC) was carried out using Wakogel B-5F from Wako Pure Chemical Industries, Ltd. Preparative thin-layer chromatography was carried out using Wakogel B-5F. Deionized water from a MILLIPORE MilliQ machine (Gradient A 10) was used as solvent without further treatment. All organic solvents used were commercially available dry solvents, which were distilled appropriately under an argon atmosphere or were stored over molecular sieves prior to use. All  $\alpha,\beta$ -unsaturated ketones **2** in this study were commercially available and were distilled –or recrystallized prior to use. Thiols **3** were commercially available and were used without any purification prior to use. Chiral bipyridine ligand **1**<sup>1</sup>,  $\text{Sc}(\text{OTf})_3$ <sup>2</sup> and  $\text{Sc}(\text{OSO}_3\text{C}_{12}\text{H}_{25})_3$ <sup>3</sup> were prepared by known method.

**Typical Experimental Procedure for allylation reaction in aqueous media (Table 3, entry 1):**

800  $\mu$ L of 0.005 M aqueous Sc(OTf)<sub>3</sub> solution (0.004 mmol) was added to chiral bipyridine ligand **1** (1.6 mg, 0.0048 mmol) and the mixture was stirred for 1 h at room temperature. After addition of pyridine (3.2  $\mu$ L, 0.04 mmol), benzalacetone **2a** (58.5 mg, 0.4 mmol) and benzylthiol **3a** (56.3  $\mu$ L, 0.48 mmol) successively, the reaction mixture was vigorously stirred for 24 h at room temperature. The resulting mixture was quenched with sat. NaHCO<sub>3</sub> aq. and brine. The aqueous layer was extracted with dichloromethane (three times), and the combined organic layers were washed with brine, and dried over Na<sub>2</sub>SO<sub>4</sub>. After filtration, the solvent was removed under reduced pressure. The residue was purified by preparative TLC (elution: chloroform/ethyl acetate = 200/1) to give the corresponding thio ethers **4a** (99.8 mg, 92% yield). The enantiomeric excess was determined by chiral HPLC analysis.

**Analytical data for Michael reactions of thiols 4a-n**

Michael reactions of thiols **4a**<sup>4</sup>, **4b**<sup>4</sup>, **4c**<sup>4</sup>, **4d**<sup>4</sup>, **4e**<sup>5</sup>, **4f**<sup>4</sup>, **4g**<sup>4</sup>, **4h**<sup>6</sup>, **4i**<sup>6</sup>, **4j**<sup>6</sup>, **4k**<sup>6</sup>, **4l**<sup>6</sup>, **4m**<sup>7</sup> are literature-known; obtained analytical data for these compounds is in full agreement with reported data. The absolute configuration of the optically active compounds was determined by comparison of the measured HPLC data with the value reported in the literature.<sup>4-7</sup>

**4a:** (*R*)-4-(benzylthio)-4-phenylbutan-2-one<sup>4</sup>

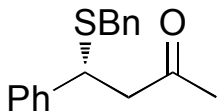

colorless oil

IR (KBr):  $\nu = 3060, 3027, 2917, 1716, 1600, 1492, 1452, 1416, 1358, 1329, 1240, 1154, 1074, 1024, 761, 699 \text{ cm}^{-1}$ .

<sup>1</sup>H NMR (500 MHz, CDCl<sub>3</sub>):  $\delta = 1.99$  (s, 3H), 2.91 (m, 2H), 3.47 (dd, 2H,  $J = 13.3, 19.1$  Hz), 4.19 (t, 1H,  $J = 7.4$  Hz), 7.18-7.34 (m, 10H).

<sup>13</sup>C NMR (125 MHz, CDCl<sub>3</sub>):  $\delta = 30.4, 35.6, 43.8, 49.9, 126.9, 127.3, 127.9, 128.4, 128.5, 128.8, 137.7, 141.4, 205.2$ .

HPLC: Daicel Chiralcel OD-H, hexane/*i*PrOH = 9/1, flow rate = 1.0 ml/min.:  $t_R = 8.3$  min (*R*),  $t_R = 9.7$  min (*S*).

**4b:** (*R*)-3-(benzylthio)-1,3-diphenylpropan-1-one<sup>4</sup>

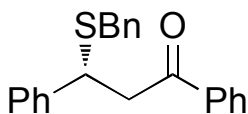

colorless solid; Mp 60 – 62 °C

IR (KBr):  $\nu = 3058, 3023, 2894, 1679, 1595, 1448, 1341, 1224, 981, 921, 727, 693 \text{ cm}^{-1}$ .

<sup>1</sup>H NMR (600 MHz, CDCl<sub>3</sub>):  $\delta = 3.37$ -3.50 (m, 4H), 4.38 (d, 1H,  $J = 5.1$  Hz), 7.12-7.25 (m, 8H), 7.30-7.34 (m, 4H), 7.45 (t, 1H,  $J = 7.2$  Hz), 7.77 (d, 2H,  $J = 6.9$  Hz).

<sup>13</sup>C NMR (150 MHz, CDCl<sub>3</sub>):  $\delta = 35.8, 44.1, 45.2, 127.0, 127.3, 128.0, 128.5, 128.5,$

128.9, 133.1, 136.6, 137.8, 141.7, 196.7.

HPLC: Daicel Chiralcel OJ-H, hexane/*i*PrOH = 4/1, flow rate = 1.0 ml/min.:  $t_R$  = 22.6 min (*S*),  $t_R$  = 33.1 min (*R*).

**4c:** (*S*)-4-(benzylthio)nonan-2-one<sup>4</sup>

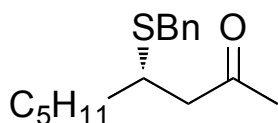

colorless oil

IR (KBr):  $\nu$  = 2954, 2927, 2856, 1715, 1455, 1419, 1359, 1157, 701  $\text{cm}^{-1}$ .

<sup>1</sup>H NMR (600 MHz, CDCl<sub>3</sub>):  $\delta$  = 0.86 (t, 3H,  $J$  = 7.2 Hz), 1.16-1.37 (m, 6H), 1.46-1.50 (m, 2H), 2.08 (s, 3H), 2.63 (ddd, 2H,  $J$  = 6.7, 16.7, 20.2 Hz), 3.03 (t, 1H,  $J$  = 6.9 Hz), 3.73 (dd, 2H,  $J$  = 13.1, 8.3 Hz), 7.21-7.33 (m, 5H).

<sup>13</sup>C NMR (150 MHz, CDCl<sub>3</sub>):  $\delta$  = 14.0, 22.5, 26.2, 30.5, 31.5, 35.0, 40.3, 49.6, 126.9, 128.4, 128.9, 138.5, 207.0.

HPLC: Daicel Chiralcel OD-H, hexane/*i*PrOH = 100/1, flow rate = 1.0 ml/min.:  $t_R$  = 8.0 min (*S*),  $t_R$  = 8.7 min (*R*).

**4d:** (*S*)-5-(benzylthio)hexan-3-one<sup>4</sup>

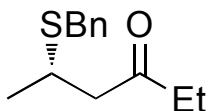

colorless oil

IR (KBr):  $\nu$  = 3061, 3028, 2973, 2934, 1712, 1494, 1454, 1410, 1361, 1239, 1199, 1115,

1070, 1027, 986, 769, 701  $\text{cm}^{-1}$ .

$^1\text{H}$  NMR (600 MHz,  $\text{CDCl}_3$ ):  $\delta$  = 1.02 (t, 3H,  $J$  = 7.2 Hz), 1.26 (d, 3H,  $J$  = 6.9 Hz), 2.34-2.37 (m, 2H), 2.50 (dd, 1H,  $J$  = 8.2, 16.7 Hz), 2.66 (dd, 1H,  $J$  = 7.6, 16.7 Hz), 3.15-3.21 (m, 1H), 3.75 (dd, 2H,  $J$  = 13.1, 7.9 Hz), 7.21-7.32 (m, 5H).

$^{13}\text{C}$  NMR (150 MHz,  $\text{CDCl}_3$ ):  $\delta$  = 7.6, 21.5, 35.0, 35.5, 36.5, 49.5, 127.0, 128.5, 128.8, 138.3, 209.2.

HPLC: Daicel Chiralcel OD-H, hexane/*i*PrOH = 100/1, flow rate = 0.8 ml/min.:  $t_{\text{R}}$  = 13.2 min (*R*),  $t_{\text{R}}$  = 14.1 min (*S*).

**4e**: (*S*)-3-(benzylthio)-1-phenylbutan-1-one <sup>5</sup>

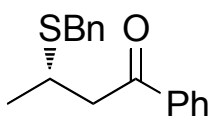

colorless oil

IR (KBr):  $\nu$  = 3584, 3060, 3027, 2964, 2921, 1683, 1597, 1580, 1493, 1449, 1353, 1221, 1180, 1071, 986, 753, 690, 641  $\text{cm}^{-1}$ .

$^1\text{H}$  NMR (500 MHz,  $\text{CDCl}_3$ ):  $\delta$  = 1.33 (d, 3H,  $J$  = 6.8 Hz), 3.05 (dd, 1H,  $J$  = 9.1, 17.0 Hz), 3.29 (dd, 1H,  $J$  = 5.1, 17.0 Hz), 3.34-3.41 (m, 1H), 1.53-1.58 (m, 1H), 3.80 (dd, 2H,  $J$  = 13.6, 17.6 Hz), 7.21-7.26 (m, 1H), 7.28-7.36 (m, 4H,  $J$  = 9.5), 7.40-7.48 (m, 2H), 7.53-7.56 (m, 1H), 7.83-7.92 (m, 2H).

$^{13}\text{C}$  NMR (125 MHz,  $\text{CDCl}_3$ ):  $\delta$  = 21.4, 35.3, 35.6, 46.0, 126.9, 128.0, 128.5, 128.6, 128.8, 133.1, 136.8, 138.3, 198.0.

HPLC: Daicel Chiralcel OD-H, hexane/*i*PrOH = 9/1, flow rate = 1.0 ml/min.:  $t_{\text{R}}$  = 7.1

min (*S*),  $t_R = 7.8$  min (*R*).

**4f:** (*R*)-4-(benzylthio)-4-(4-chlorophenyl)butan-2-one <sup>4</sup>

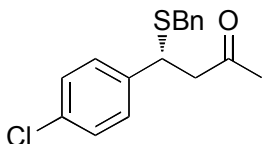

colorless oil

IR (KBr):  $\nu = 3437, 2922, 1716, 1596, 1453, 1417, 1367, 1201, 1099, 953, 699$   $\text{cm}^{-1}$ .

<sup>1</sup>H NMR (600 MHz, CDCl<sub>3</sub>):  $\delta = 2.02$  (s, 3H), 2.89 (d, 2H,  $J = 7.6$  Hz), 3.42 (d, 1H,  $J = 13.7$  Hz), 3.52 (d, 1H,  $J = 13.7$  Hz), 4.16 (t, 3H,  $J = 7.5$  Hz), 7.18-7.29 (m, 9H).

<sup>13</sup>C NMR (150 MHz, CDCl<sub>3</sub>):  $\delta = 30.5, 35.7, 43.0, 49.8, 127.1, 128.5, 128.7, 128.9, 129.3, 132.9, 137.5, 140.1, 204.9$ .

HPLC: Daicel Chiralpak AS-H, hexane/*i*PrOH = 9/1, flow rate = 0.5 ml/min.:  $t_R = 19.8$  min (*R*),  $t_R = 20.9$  min (*S*).

**4g:** (*R*)-4-(benzylthio)-4-(thiophen-2-yl)butan-2-one <sup>4</sup>

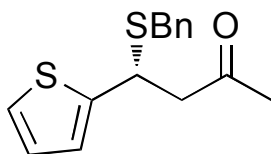

colorless oil

IR (KBr):  $\nu = 3583, 3063, 3028, 2918, 1713, 1493, 1450, 1417, 1360, 1242, 1154, 1043, 701, 661$   $\text{cm}^{-1}$ .

<sup>1</sup>H NMR (600 MHz, CDCl<sub>3</sub>):  $\delta = 2.05$ (s, 3H), 2.97(ddd, 2H,  $J = 7.2, 16.8, 21.3$  Hz),

3.61(dd, 2H,  $J = 13.7, 18.5$  Hz), 4.51(t, 1H,  $J = 7.2$  Hz), 6.91(m, 2H), 7.22-7.26 (m, 4H), 7.28-7.31 (m, 2H).

$^{13}\text{C}$  NMR (150 MHz,  $\text{CDCl}_3$ ):  $\delta = 30.5, 35.9, 39.1, 50.8, 124.8, 125.8, 126.4, 127.1, 128.5, 128.9, 137.6, 146.3, 204.9$ .

HPLC: Daicel Chiralpak AD-H, hexane/*i*PrOH = 9/1, flow rate = 0.5 ml/min.:  $t_R = 13.1$  min (*S*),  $t_R = 15.0$  min (*R*).

**4h:** (*R*)-1,3-diphenyl-3-(phenylthio)propan-1-one <sup>6</sup>

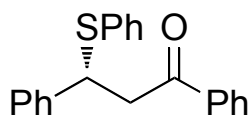

colorless solid; Mp 115 – 118 °C

IR (KBr):  $\nu = 3062, 2901, 1675, 1587, 1450, 1335, 1229, 1079, 981, 743, 734, 691$   $\text{cm}^{-1}$ .

$^1\text{H}$  NMR (600 MHz,  $\text{CDCl}_3$ ):  $\delta = 3.62$  (ddd, 2H,  $J = 7.2, 17.2, 27.0$  Hz), 4.96 (dd, 1H,  $J = 5.5, 8.3$  Hz), 7.17-7.34 (m, 10H), 7.42-7.45 (m, 2H), 7.53-7.56 (m, 1H), 7.87-7.89 (m, 2H).

$^{13}\text{C}$  NMR (150 MHz,  $\text{CDCl}_3$ ):  $\delta = 14.0, 22.5, 26.3, 30.6, 31.5, 35.1, 35.7, 40.4, 44.6, 48.2, 49.6, 127.0, 127.4, 127.5, 127.8, 128.1, 128.4, 128.5, 128.6, 128.8, 132.7, 133.3, 134.2, 136.7, 138.5, 141.1, 197.0, 207.0$ .

HPLC: Daicel Chiralcel OJ-H, hexane/*i*PrOH = 4/1, flow rate = 1.0 ml/min.:  $t_R = 26.8$  min (*S*),  $t_R = 60.3$  min (*R*).



**4i:** (*R*)-3-(ethylthio)-1,3-diphenylpropan-1-one <sup>6</sup>

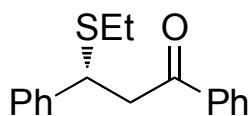

colorless solid; Mp 57 – 60 °C

IR (KBr):  $\nu = 2968, 2923, 1683, 1594, 1448, 1409, 1365, 1338, 1222, 979, 752, 713, 695 \text{ cm}^{-1}$ .

<sup>1</sup>H NMR (600 MHz, CDCl<sub>3</sub>):  $\delta = 1.17$  (t, 3H,  $J = 7.2$  Hz), 2.36 (q, 2H,  $J = 7.6$  Hz), 3.54 (dd, 2H,  $J = 3.7, 7.2$  Hz), 4.59 (t, 1H), 7.26-7.55 (m, 8H), 7.92 (d, 2H,  $J = 8.3$  Hz).

<sup>13</sup>C NMR (150 MHz, CDCl<sub>3</sub>):  $\delta = 14.3, 25.4, 43.9, 45.3, 127.2, 127.8, 128.1, 128.5, 128.6, 133.2, 136.7, 142.2, 197.0$ .

HPLC: Daicel Chiralpak AS-H, hexane/*i*PrOH = 9/1, flow rate = 0.5 ml/min.:  $t_R = 12.4$  min (*R*),  $t_R = 15.7$  min (*S*).

**4j:** (*R*)-3-(isopropylthio)-1,3-diphenylpropan-1-one <sup>6</sup>

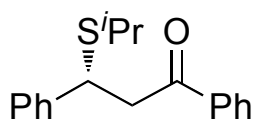

colorless solid; Mp 77 – 80 °C

IR (KBr):  $\nu = 3061, 2965, 2924, 2866, 1638, 1589, 1449, 1364, 1334, 1222, 979, 750, 710, 694 \text{ cm}^{-1}$ .

<sup>1</sup>H NMR (600 MHz, CDCl<sub>3</sub>):  $\delta = 1.06$  (d, 3H,  $J = 6.9$  Hz), 1.20 (d, 3H,  $J = 6.9$  Hz), 2.56 (sep, 1H,  $J = 6.7$  Hz), 3.45 (m, 2H), 4.56 (t, 1H,  $J = 1.7$  Hz), 7.12-7.15 (m, 1H), 7.21-7.24 (m, 2H), 7.35-7.38 (m, 4H), 7.46-7.49 (m, 1H), 7.84 (d, 2H,  $J = 7.5$  Hz).

$^{13}\text{C}$  NMR (150 MHz,  $\text{CDCl}_3$ ):  $\delta = 22.9, 23.4, 34.6, 43.3, 45.7, 127.1, 127.8, 128.1, 128.5, 128.6, 133.2, 136.8, 142.6, 197.0$ .

HPLC: Daicel Chiralpak AS-H, hexane/*i*PrOH = 9/1, flow rate = 0.5 ml/min.:  $t_{\text{R}} = 10.8$  min (*R*),  $t_{\text{R}} = 12.2$  min (*S*).

**4k:** (*R*)-3-(cyclopentylthio)-1,3-diphenylpropan-1-one <sup>6</sup>

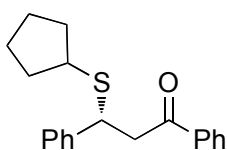

colorless solid; Mp 67 – 69 °C

IR (KBr):  $\nu = 2953, 2861, 1714, 1682, 1595, 1493, 1449, 1410, 1361, 1337, 1229, 1075, 1050, 980, 749, 725, 700, 687 \text{ cm}^{-1}$ .

$^1\text{H}$  NMR (500 MHz,  $\text{CDCl}_3$ ):  $\delta = 1.31\text{-}1.38$  (m, 1H), 1.41-1.54 (m, 2H), 1.57-1.81 (m, 4H), 1.93-2.00 (m, 1H), 2.80 (ddd, 1H,  $J = 7.4, 7.2, 14.3$  Hz), 3.53 (q, 2H,  $J = 7.1$  Hz), 4.59 (t, 1H,  $J = 7.1$  Hz), 7.19-7.22 (m, 1H), 7.26-7.31 (m, 2H), 7.41-7.45 (m, 4H), 7.52-7.55 (m, 1H), 7.90-7.91 (m, 2H).

$^{13}\text{C}$  NMR (125 MHz,  $\text{CDCl}_3$ ):  $\delta = 24.7, 24.9, 33.1, 34.0, 43.1, 44.4, 45.5, 127.1, 127.7, 128.1, 128.1, 128.4, 128.6, 133.1, 136.8, 197.0$ .

HPLC: Daicel Chiralpak AS-H, hexane/*i*PrOH = 9/1, flow rate = 0.5 ml/min.:  $t_{\text{R}} = 12.4$  min (*R*),  $t_{\text{R}} = 13.6$  min (*S*).

**4l:** (*R*)-3-((4-(*tert*-butyl)benzyl)thio)-1,3-diphenylpropan-1-one <sup>6</sup>

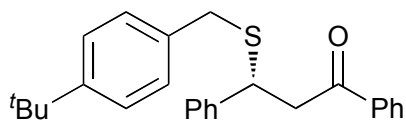

colorless solid; Mp 82 – 84 °C

IR (KBr):  $\nu = 3429, 2960, 1682, 1450, 1363, 1342, 1230, 754, 705, 696 \text{ cm}^{-1}$ .

$^1\text{H}$  NMR (500 MHz,  $\text{CDCl}_3$ ):  $\delta = 1.29$  (s, 9H), 3.43-3.56 (m, 4H), 4.48 (dd, 1H,  $J = 6.2, 7.9$  Hz), 7.14 (d, 2H,  $J = 7.9$  Hz), 7.19-7.22 (m, 1H), 7.27-7.31 (m, 4H), 7.35-7.39 (m, 4H), 7.40-7.51 (m, 1H), 7.83 (d, 2H,  $J = 7.9$  Hz).

$^{13}\text{C}$  NMR (125 MHz,  $\text{CDCl}_3$ ):  $\delta = 31.3, 34.4, 35.3, 44.1, 45.2, 125.3, 127.2, 128.0, 128.4, 128.5, 128.5, 133.1, 134.7, 136.6, 141.7, 149.7, 196.7$ .

HPLC: Daicel Chiralcel OJ-H, hexane/*i*PrOH = 7/3, flow rate = 0.5 ml/min.:  $t_R = 23.7$  min (*R*),  $t_R = 30.3$  min (*S*).

**4m:** (*R*)-3-(benzylthio)cyclohexanone <sup>7</sup>

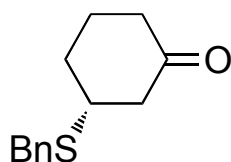

colorless oil

IR (KBr):  $\nu = 3060, 3027, 2940, 2867, 1712, 1601, 1493, 1451, 1421, 1314, 1222, 1094, 1069, 1030, 971, 766, 703 \text{ cm}^{-1}$ .

$^1\text{H}$  NMR (600 MHz,  $\text{CDCl}_3$ ):  $\delta = 1.61$ -1.75 (m, 2H), 2.05-2.12 (m, 2H), 2.26-2.40 (m, 3H), 2.66 (dd, 1H,  $J = 4.5$  Hz), 2.89-2.95 (m, 1H), 3.75 (dd,  $J = 13.6, 16.4$  Hz), 7.22-7.34 (m, 5H)

$^{13}\text{C}$  NMR (150 MHz,  $\text{CDCl}_3$ ):  $\delta$  = 24.0, 31.2, 34.8, 40.9, 41.8, 47.7, 127.0, 128.5, 128.6, 137.8, 208.7.

HPLC: Daicel Chiralpak AD-H, hexane/*i*PrOH = 9/1, flow rate = 0.5 ml/min.:  $t_{\text{R}}$  = 14.6 min (*R*),  $t_{\text{R}}$  = 16.0 min (*S*).

## References

1. Ishikawa, S.; Hamada, T.; Manabe, K.; Kobayashi, S. *Synthesis*, **2005**, 2176.
2. (a) Thom, K. F., **1971**, US Patent 3615169. See, also: (b) Kobayashi, S. *Synlett*, **1994**, 689.
3. Kobayashi, S.; Wakabayashi, T. *Tetrahedron Lett.*, **1998**, 39, 5389.
4. Ricci, P.; Carlone, A.; Bartoli, G.; Bosco, M.; Sambri, L.; Melchiorre, P. *Adv. Synth. Catal.*, **2008**, 350, 49.
5. Yin, Y.; Jiang, H.; Ma, J.; Zhang, H.; Yin, C.; Li, S. *Huaxue Yanjiu Yu Yingyong*, **2010**, 22, 492.
6. Dai, L.; Wang, S-X.; Chen, F-E. *Adv. Synth. Catal.*, **2010**, 352, 2137.
7. Saito, M.; Nakajima, M.; Hashimoto, S. *Tetrahedron*, **2000**, 56, 9589.

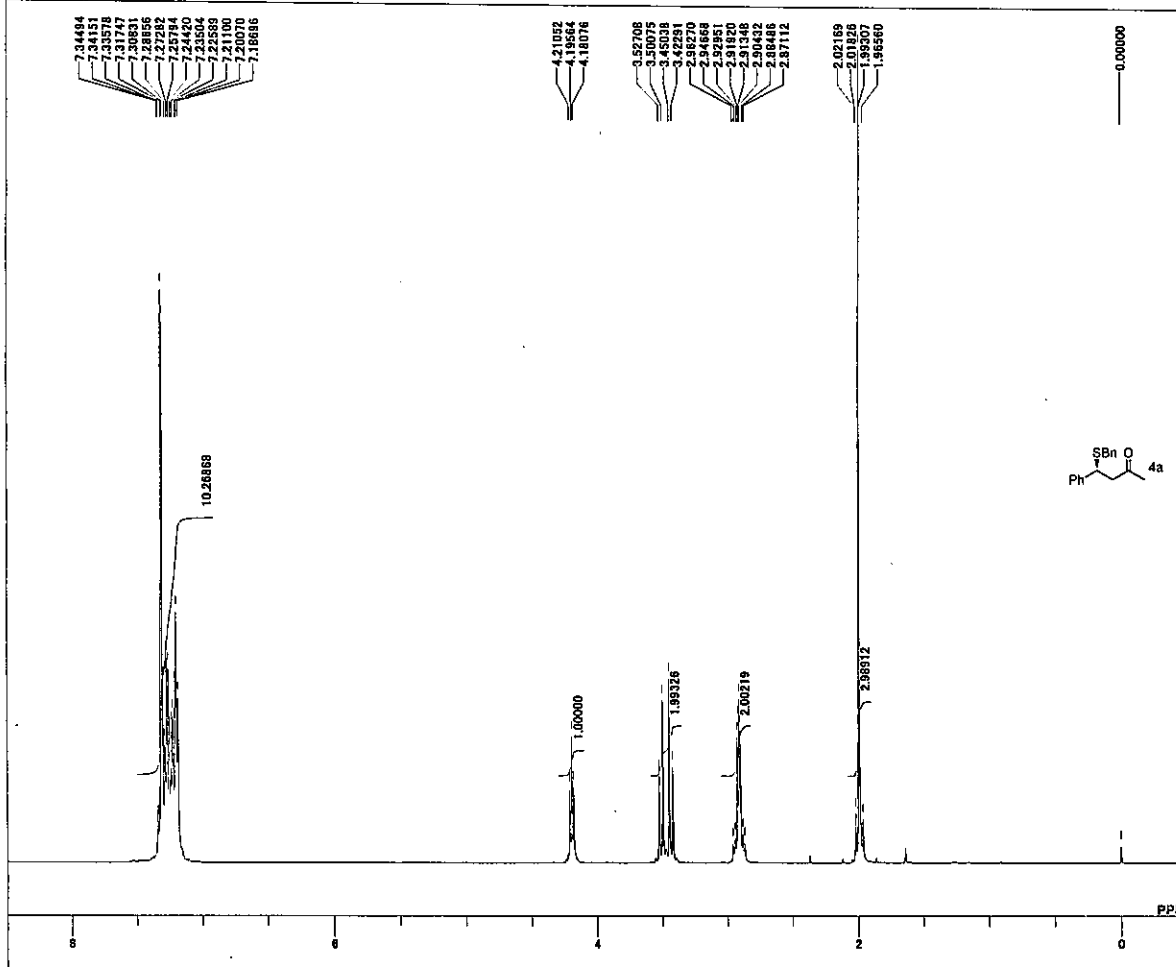

DFILE C:\Documents and Settings\VALICE2\Desktop\1445-H  
COMNT 17-01-2011 18:02:42  
DATIM 1445-H  
OBNUC 1H  
EXMOD 1H NMR.ex2  
OBFRQ 495.13 MHz  
OBSET 4.38 KHz  
OBFIN 3.84 Hz  
POINT 16384  
FREQU 9286.78 Hz  
SCANS 8  
ACQTM 1.7842 sec  
PD 5.0000 sec  
PWI 5.80 usec  
IRNUC 1H  
CTEMP 19.1 c  
SLVNT CDCL3  
EXREF 0.00 ppm  
BF 0.12 Hz  
RGAIN 32

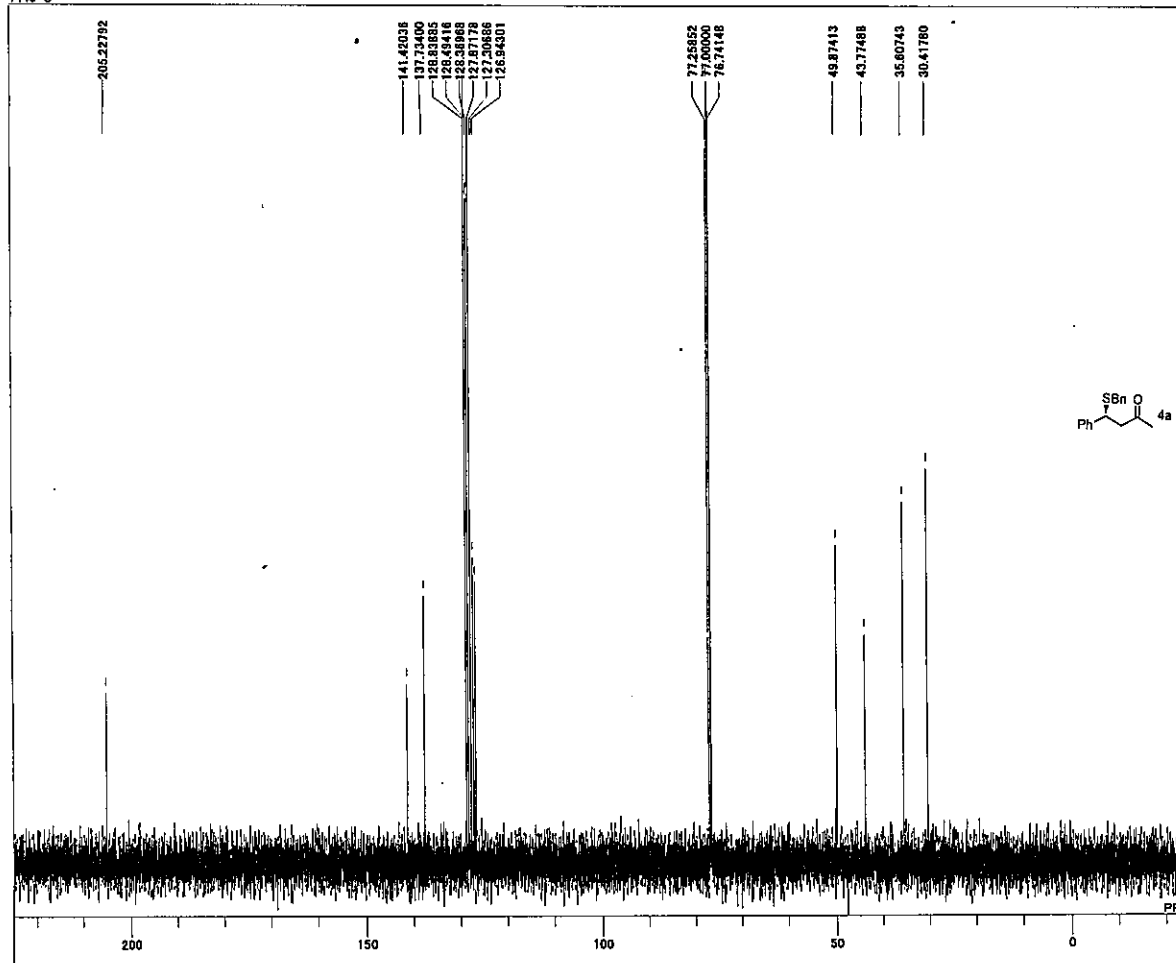

DFILE C:\Documents and Settings\VALICE2\Desktop\1445-C  
COMNT 17-01-2011 18:09:50  
DATIM 1445-C  
OBNUC 13C  
EXMOD 13C NMR.ex2  
OBFRQ 124.51 MHz  
OBSET 3.45 KHz  
OBFIN 6.00 Hz  
POINT 32768  
FREQU 39082.50 Hz  
SCANS 115  
ACQTM 6.8389 sec  
PD 2.0000 sec  
PWI 3.67 usec  
IRNUC 1H  
CTEMP 19.6 c  
SLVNT CDCL3  
EXREF 77.00 ppm  
BF 0.12 Hz  
RGAIN 60

Analysis FILE : 9:@FIL15.FIL

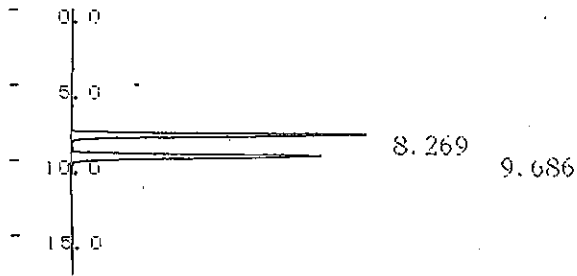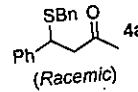

\*\* CALCULATION REPORT \*\*

| CH    | PKNO | TIME  | AREA   | HEIGHT | MK | IDNO | CONC    | NAME |
|-------|------|-------|--------|--------|----|------|---------|------|
| 1     | 12   | 8.269 | 275868 | 17746  | V  |      | 50.2205 |      |
|       | 14   | 9.686 | 273445 | 15029  | V  |      | 49.7795 |      |
| TOTAL |      |       | 549313 | 32775  |    |      | 100     |      |

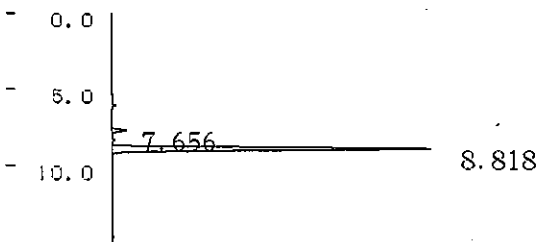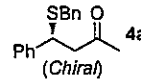

\*\* CALCULATION REPORT \*\*

| CH    | PKNO | TIME  | AREA    | HEIGHT | MK | IDNO | CONC    | NAME |
|-------|------|-------|---------|--------|----|------|---------|------|
| 1     | 18   | 7.656 | 152323  | 13641  | V  |      | 3.4792  |      |
|       | 20   | 8.818 | 4225784 | 306409 | SV |      | 96.5208 |      |
| TOTAL |      |       | 4378107 | 320051 |    |      | 100     |      |

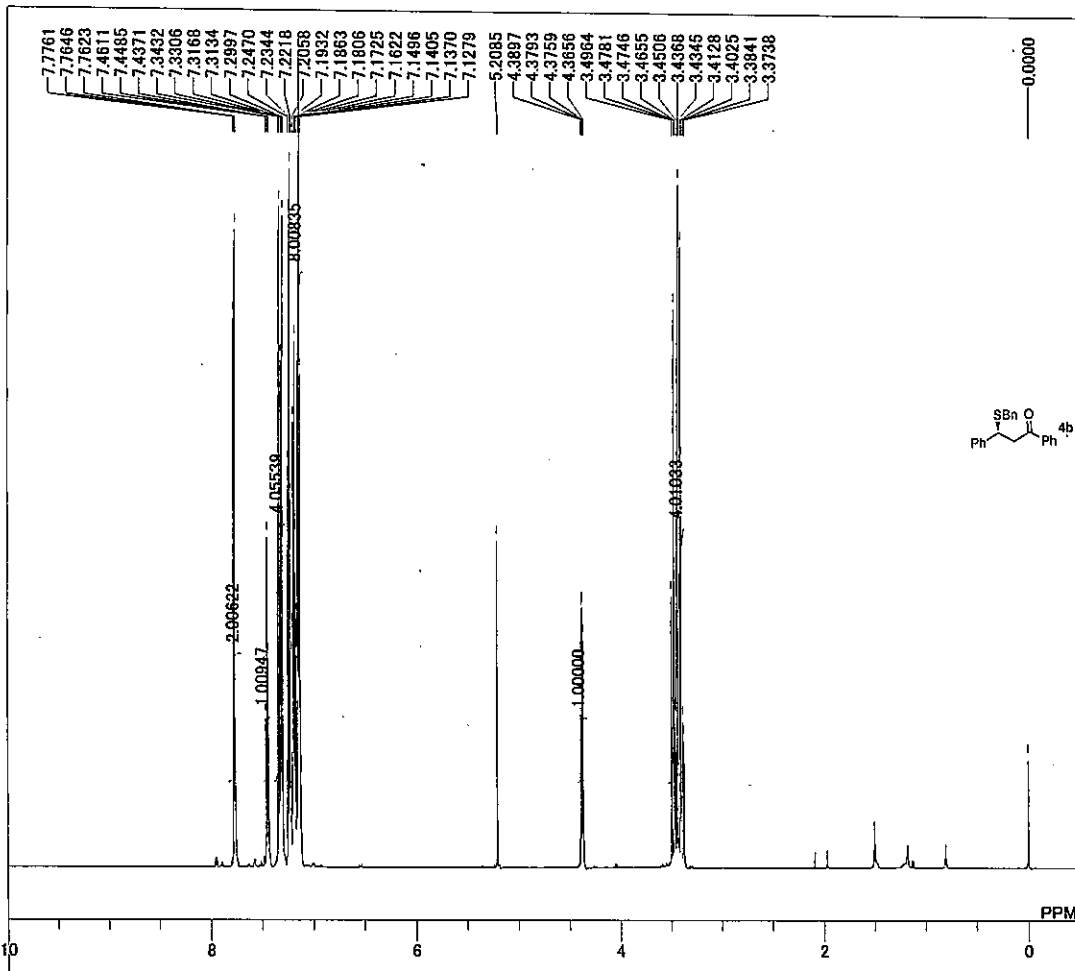

DFILE 17-02-2011 22:03:54  
 COMINT 1H  
 DATIM single\_pulse.ex2  
 OBNUC 600.17 MHz  
 EXMOD 5.30 KHz  
 OBFRQ 5.47 Hz  
 OBSET 16384  
 OBFIN 11261.26 Hz  
 POINT 16  
 FREQU 1.4549 sec  
 SCANS 4.0000 sec  
 ACQTM 6.50 usec  
 PD 1H  
 PW1 18.4 c  
 IRNUC CDCL3  
 CTEMP 0.00 ppm  
 SLVNT 0.12 Hz  
 EXREF 38  
 BF  
 RGAIN

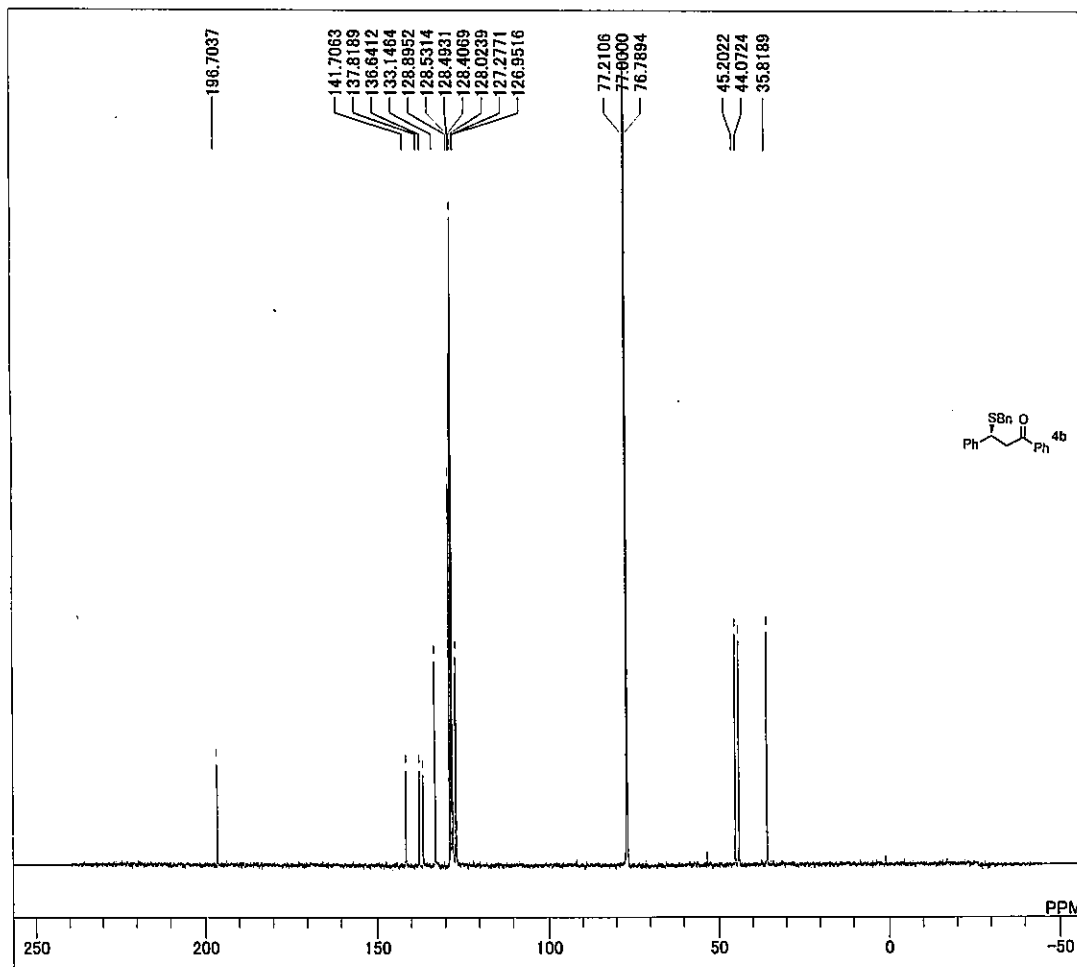

DFILE 17-02-2011 10:17:37  
 COMINT 13C  
 DATIM single\_pulse\_dec  
 OBNUC 150.92 MHz  
 EXMOD 8.52 KHz  
 OBFRQ 1.74 Hz  
 OBSET 40961  
 OBFIN 59186.51 Hz  
 POINT 1024  
 FREQU 0.8921 sec  
 SCANS 2.0000 sec  
 ACQTM 2.87 usec  
 PD 1H  
 PW1 19.9 c  
 IRNUC CDCL3  
 CTEMP 225.35 ppm  
 SLVNT 0.12 Hz  
 EXREF 60  
 BF  
 RGAIN

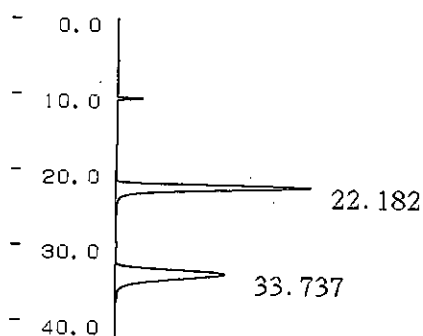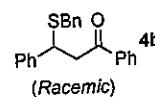

\*\* CALCULATION REPORT \*\*

| CH    | PKNO | TIME   | AREA     | HEIGHT | MK | IDNO | CONC   | NAME |
|-------|------|--------|----------|--------|----|------|--------|------|
| 1     | 18   | 22.182 | 9529701  | 186725 |    |      | 49.874 |      |
|       | 20   | 33.737 | 9577868  | 105408 |    |      | 50.126 |      |
| TOTAL |      |        | 19107568 | 292133 |    |      | 100    |      |

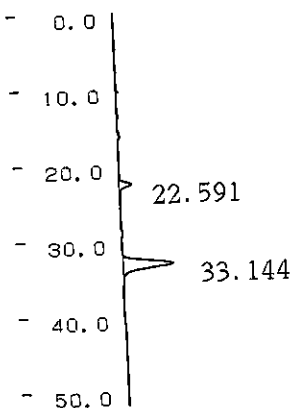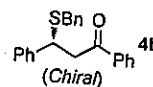

\*\* CALCULATION REPORT \*\*

| CH    | PKNO | TIME   | AREA   | HEIGHT | MK | IDNO | CONC    | NAME |
|-------|------|--------|--------|--------|----|------|---------|------|
| 1     | 51   | 22.591 | 66171  | 1406   |    |      | 13.6724 |      |
|       | 56   | 33.144 | 417806 | 6024   |    |      | 86.3276 |      |
| TOTAL |      |        | 483977 | 7431   |    |      | 100     |      |



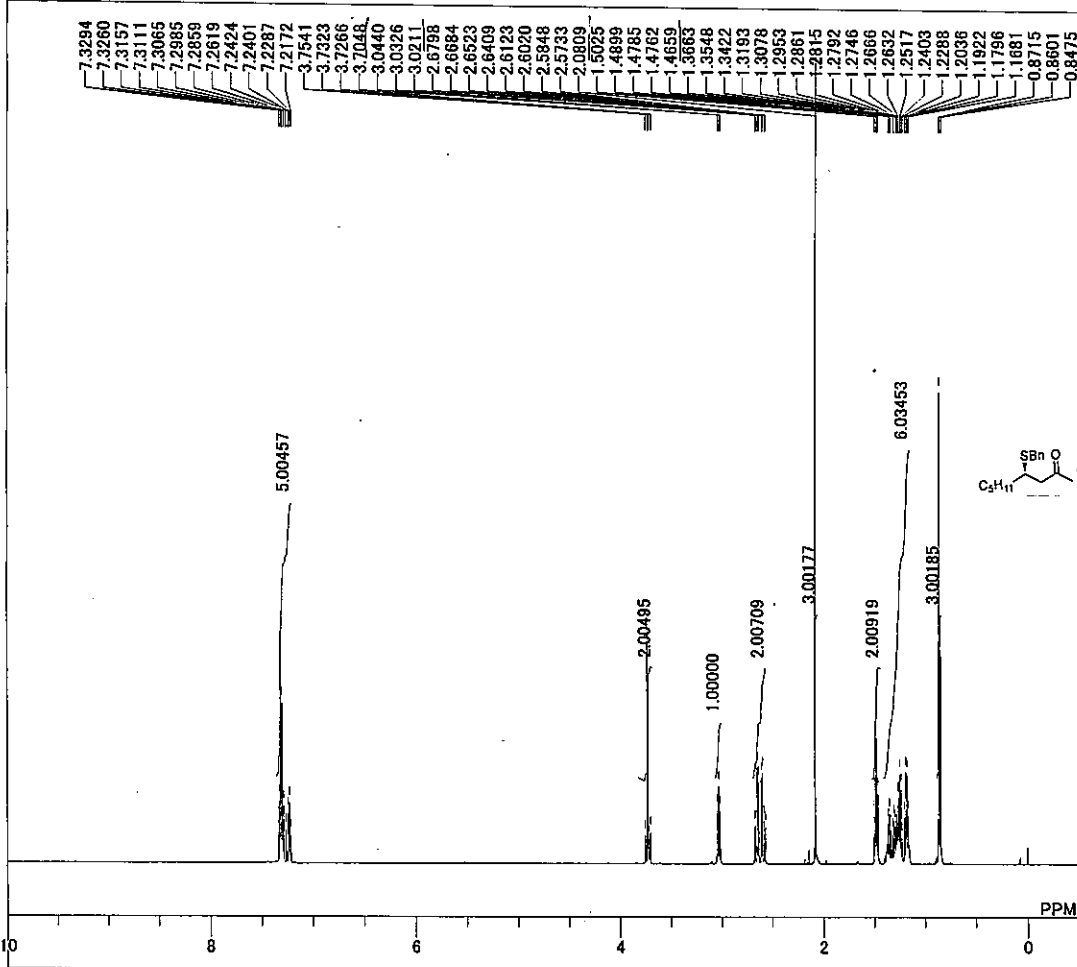

DFILE  
COMNT  
DATIM  
OBNUC  
EXMOD  
OBFREQ  
OBSET  
OBFIN  
POINT  
FREQU  
SCANS  
ACQTM  
PD  
PW1  
IRNUC  
CTEMP  
SLVNT  
EXREF  
BF  
RGAIN

1H  
single\_pulse.ex2  
600.17 MHz  
5.30 KHz  
5.47 Hz  
16384  
11261.26 Hz  
8  
1.4549 sec  
2.0000 sec  
6.50 usec

1H  
17.9 c  
CDCL3  
0.00 ppm  
0.12 Hz  
32

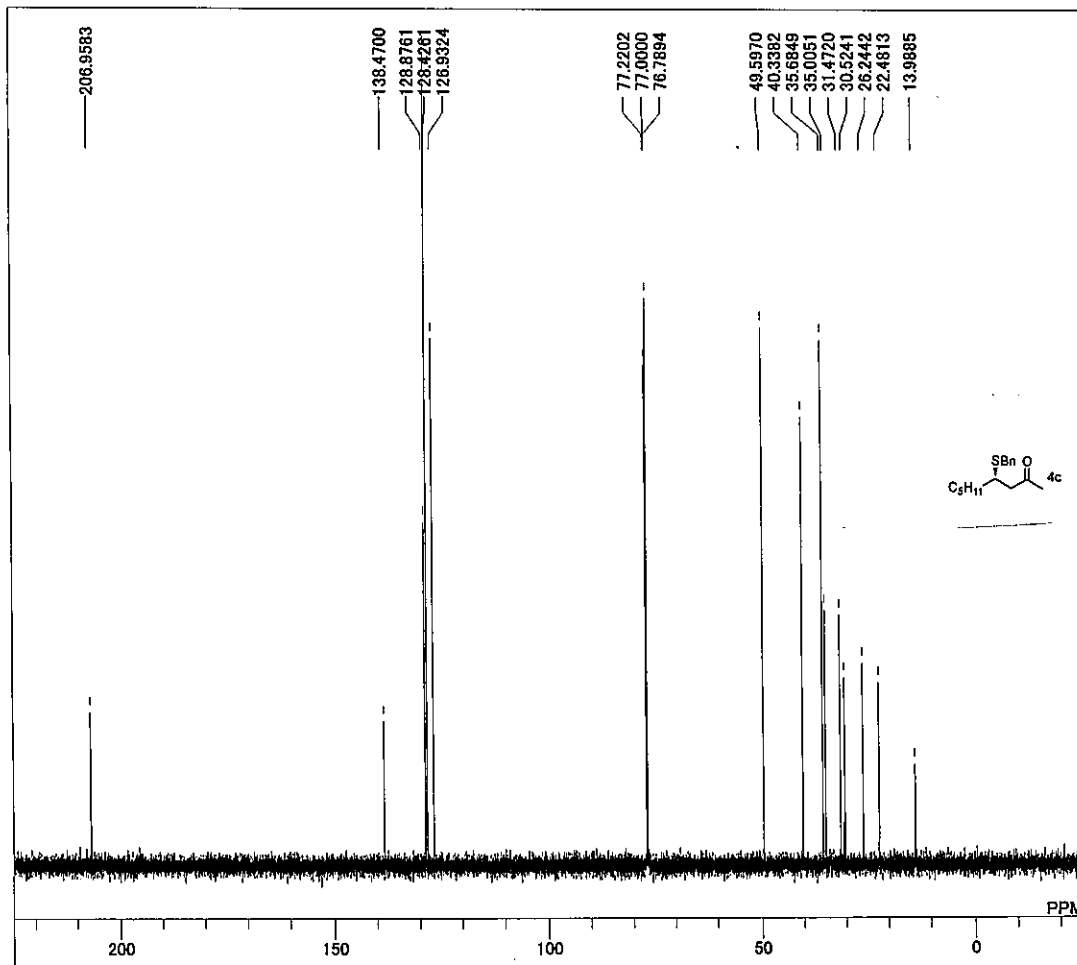

DFILE  
COMNT  
DATIM  
OBNUC  
EXMOD  
OBFREQ  
OBSET  
OBFIN  
POINT  
FREQU  
SCANS  
ACQTM  
PD  
PW1  
IRNUC  
CTEMP  
SLVNT  
EXREF  
BF  
RGAIN

13C  
18-02-2011 09:58:22  
single\_pulse\_dec  
150.92 MHz  
8.52 KHz  
1.74 Hz  
32768  
47348.49 Hz  
102  
0.6921 sec  
2.0000 sec  
2.87 usec

1H  
18.9 c  
CDCL3  
77.00 ppm  
0.12 Hz  
60

C-RSA CHROMATOPAC CH=1 Report No.=57

DATA=1:@CHRM1.C00 11/02/18 21:20:08

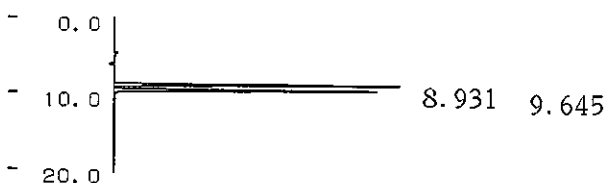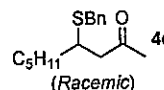

\*\* CALCULATION REPORT \*\*

| CH    | PKNO | TIME  | AREA    | HEIGHT | MK | IDNO | CONC    | NAME |
|-------|------|-------|---------|--------|----|------|---------|------|
| 1     | 30   | 8.931 | 842195  | 68494  | V  |      | 50.104  |      |
|       | 31   | 9.645 | 838698  | 63154  | V  |      | 49.8959 |      |
| TOTAL |      |       | 1680893 | 131648 |    |      | 100     |      |

C-RSA CHROMATOPAC CH=1 Report No.=14

DATA=1:@CHRM1.C00 11/02/18 11:13:06

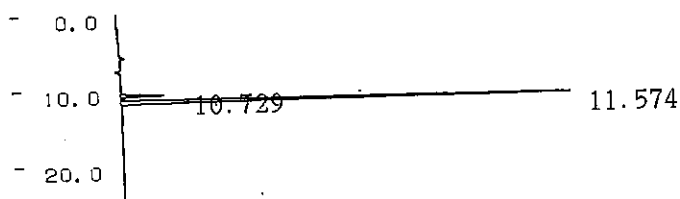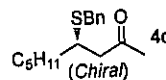

\*\* CALCULATION REPORT \*\*

| CH    | PKNO | TIME   | AREA    | HEIGHT | MK | IDNO | CONC    | NAME |
|-------|------|--------|---------|--------|----|------|---------|------|
| 1     | 4    | 10.729 | 146839  | 10313  |    |      | 8.1848  |      |
|       | 5    | 11.574 | 1647210 | 107556 | V  |      | 91.8152 |      |
| TOTAL |      |        | 1794049 | 117869 |    |      | 100     |      |

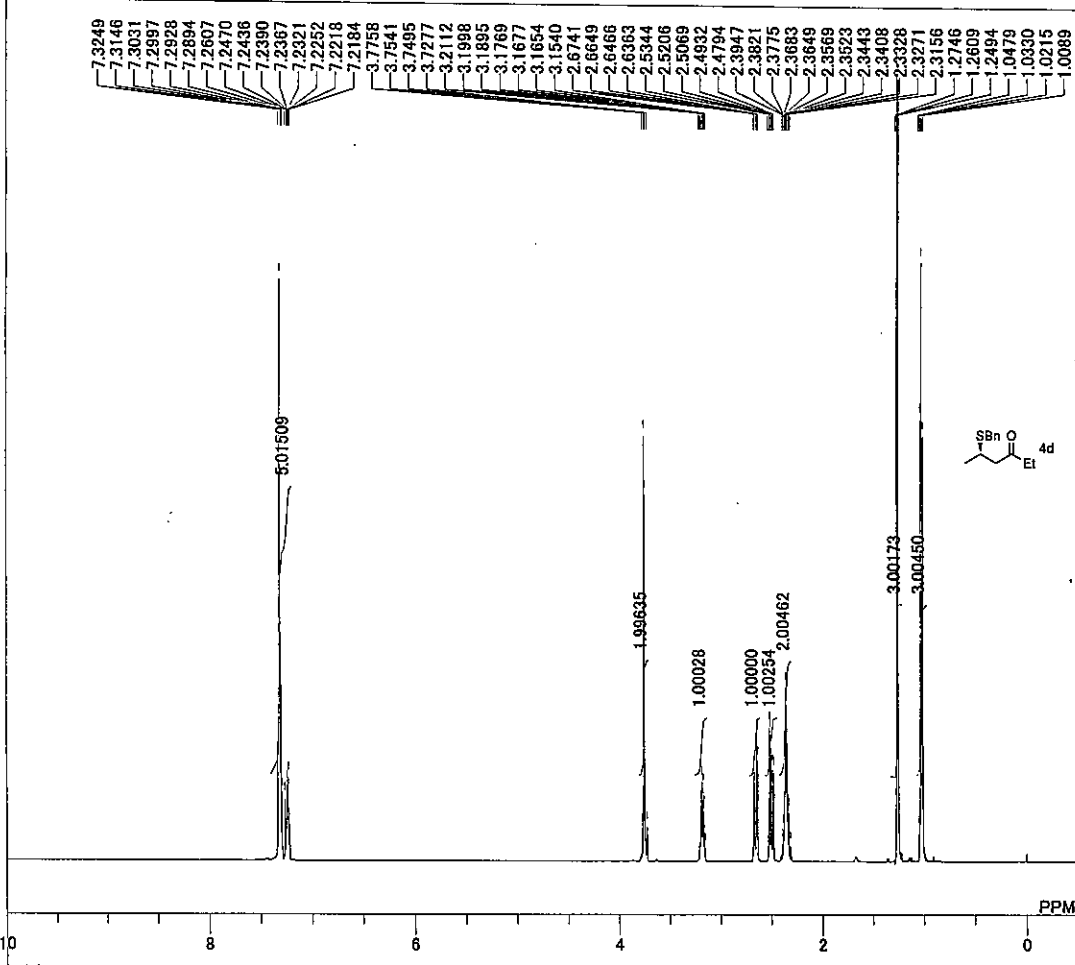

DFILE  
COMNT  
DATIM 16-02-2011 02:25:50  
OBNUC 1H  
EXMOD single\_pulse.ex2  
OBFRQ 600.17 MHz  
OBSET 5.30 KHz  
OBFIN 5.47 Hz  
POINT 13107  
FREQU 9008.87 Hz  
SCANS 8  
ACQTM 1.4549 sec  
PD 2.0000 sec  
PW1 6.50 usec  
IRNUC 1H  
CTEMP 17.6 c  
SLVNT CDCL3  
EXREF 0.00 ppm  
BF 0.12 Hz  
RGAIN 34

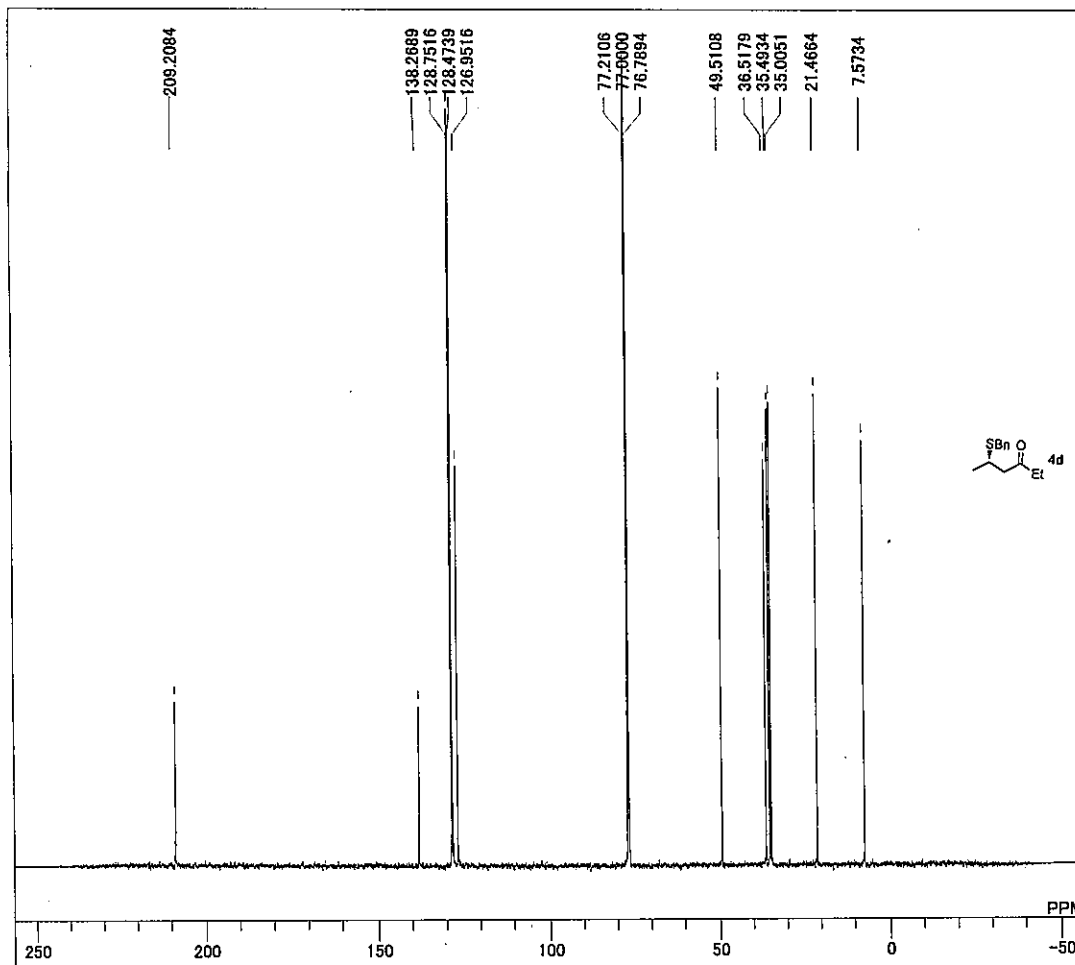

DFILE  
COMNT  
DATIM 16-02-2011 12:33:59  
OBNUC 13C  
EXMOD single\_pulse\_dec  
OBFRQ 150.92 MHz  
OBSET 8.52 KHz  
OBFIN 1.74 Hz  
POINT 40961  
FREQU 59186.51 Hz  
SCANS 1024  
ACQTM 0.6921 sec  
PD 2.0000 sec  
PW1 2.87 usec  
IRNUC 1H  
CTEMP 19.6 c  
SLVNT CDCL3  
EXREF 77.00 ppm  
BF 0.12 Hz  
RGAIN 60

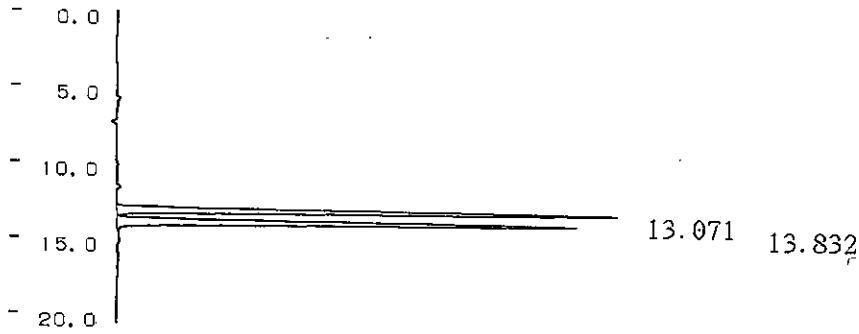

\*\* CALCULATION REPORT \*\*

| CH    | PKNO | TIME   | AREA    | HEIGHT | MK | IDNO | CONC    | NAME |
|-------|------|--------|---------|--------|----|------|---------|------|
| 1     | 7    | 13.071 | 919712  | 60300  | V  |      | 49.2023 |      |
|       | 8    | 13.832 | 949535  | 55259  | V  |      | 50.7977 |      |
| TOTAL |      |        | 1869247 | 115559 |    |      | 100     |      |

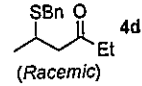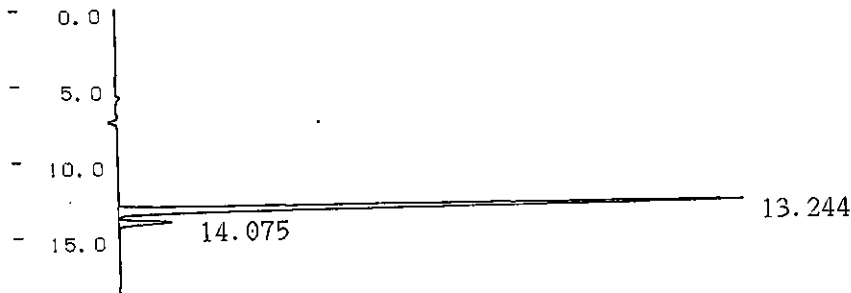

\*\* CALCULATION REPORT \*\*

| CH    | PKNO | TIME   | AREA    | HEIGHT | MK | IDNO | CONC    | NAME |
|-------|------|--------|---------|--------|----|------|---------|------|
| 1     | 7    | 13.244 | 1205202 | 75281  | V  |      | 91.8344 |      |
|       | 8    | 14.075 | 107162  | 6372   | V  |      | 8.1656  |      |
| TOTAL |      |        | 1312364 | 81654  |    |      | 100     |      |

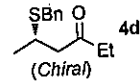

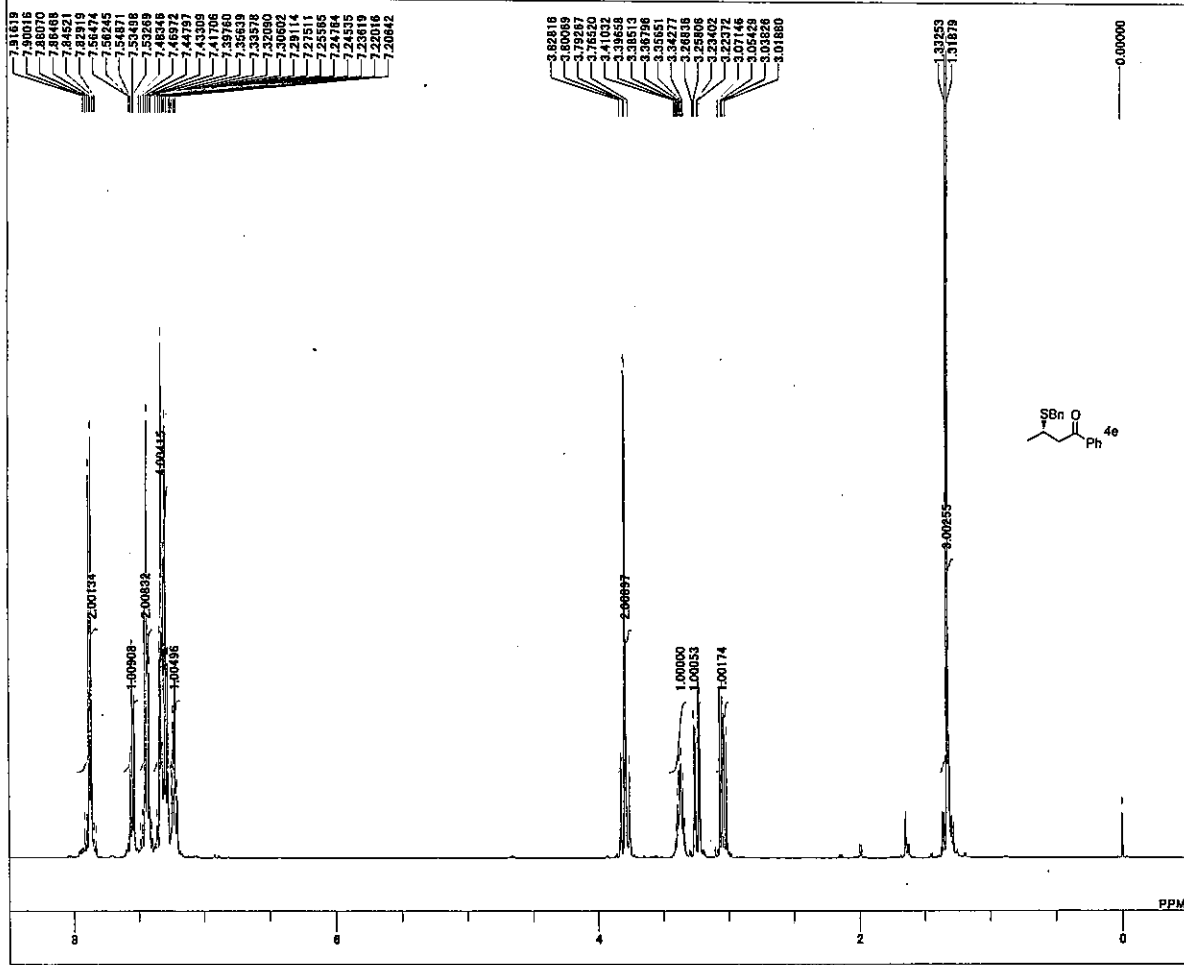

DFILE C:\Documents and Settings\VALICEZY\Desktop\1497-H-1.jdf  
COMNT 1497-H  
DATM 18-02-2011 13:30:34  
IN 1H  
INMR 1H NMR.ex2  
OBNUC 495.13 MHz  
EXMOD 4.38 KHz  
OBFRQ 9.84 Hz  
OBSET 16384  
OBFIN 9286.78 Hz  
POINT 8  
FREQU 8  
SCANS 1.7642 sec  
ACQTM 5.0000 sec  
PD 5.80 usec  
PW1 1H  
IRNUC 18.2 °  
CTEMP CDCL3  
SLVNT 0.00 ppm  
EXREF 0.12 Hz  
BF 34  
RGAIN

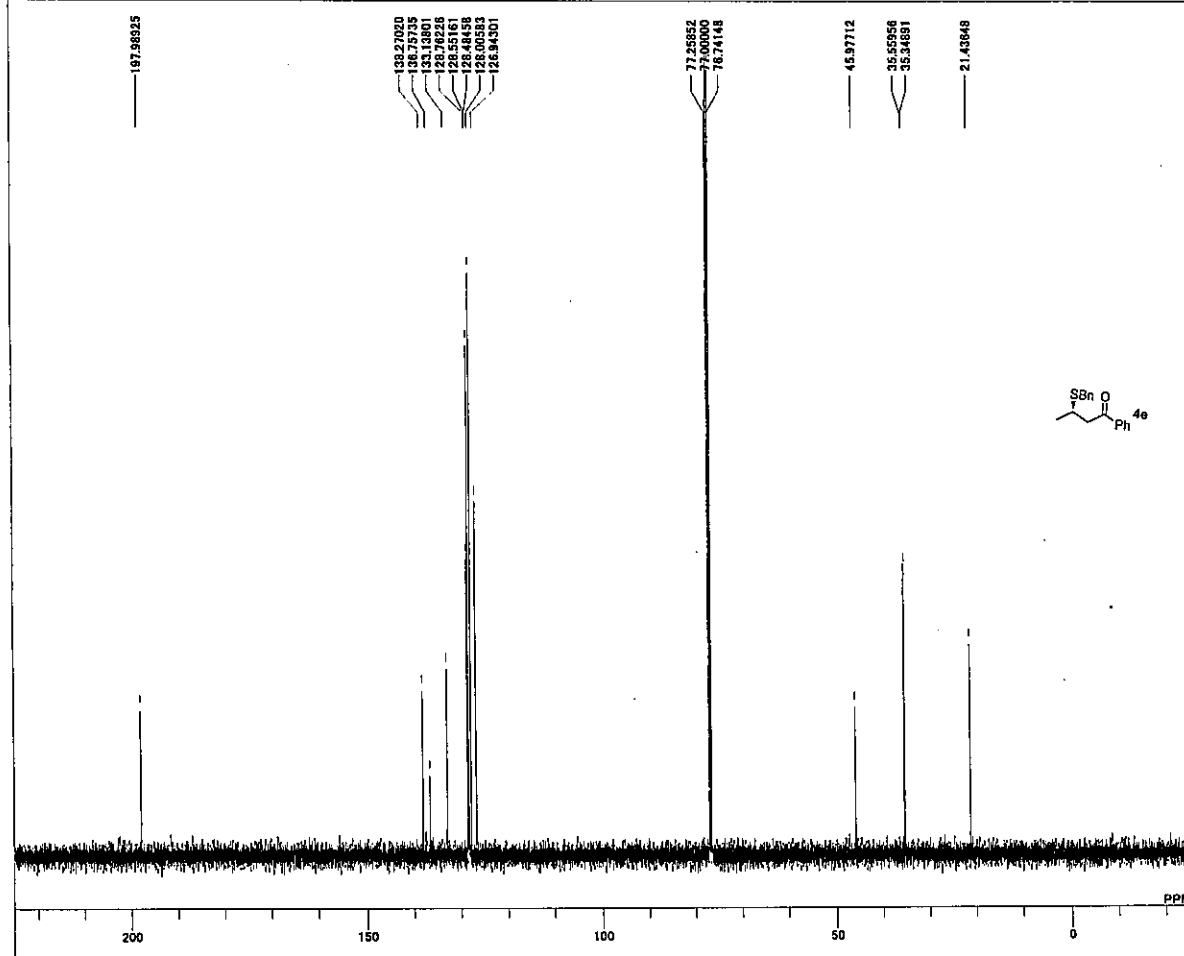

DFILE C:\Documents and Settings\VALICEZY\Desktop\1497-C-1.jdf  
COMNT 1497-C  
DATM 18-02-2011 13:51:06  
IN 13C  
INMR 13C NMR.ex2  
OBNUC 124.51 MHz  
EXMOD 3.45 KHz  
OBFRQ 6.00 Hz  
OBSET 32768  
OBFIN 39062.50 Hz  
POINT 412  
FREQU 0.8389 sec  
SCANS 2.0000 sec  
ACQTM 3.67 usec  
PD 1H  
IRNUC 18.9 °  
CTEMP CDCL3  
SLVNT 77.00 ppm  
EXREF 0.12 Hz  
BF 80  
RGAIN

C-RSA CHROMATOPAC CH=1 Report No.=47

DATA=1:@CHRM1.C00 11/02/18 20:01:04

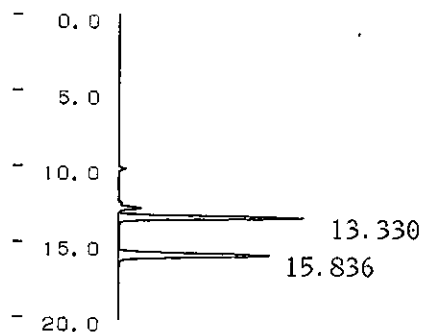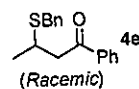

\*\* CALCULATION REPORT \*\*

| CH    | PKNO | TIME   | AREA     | HEIGHT | MK | IDNO | CONC    | NAME |
|-------|------|--------|----------|--------|----|------|---------|------|
| 1     | 32   | 13.33  | 5367378  | 355094 | SV |      | 50.2085 |      |
|       | 35   | 15.836 | 5322805  | 288860 | V  |      | 49.7915 |      |
| TOTAL |      |        | 10690183 | 643954 |    |      | 100     |      |

C-RSA CHROMATOPAC CH=1 Report No.=31

DATA=1:@CHRM1.C00 11/02/17 22:03:50

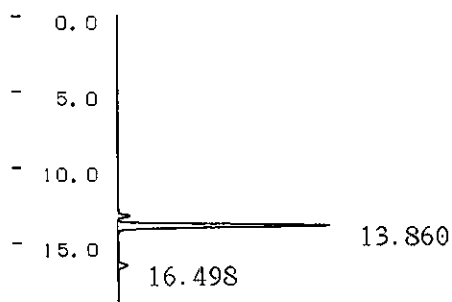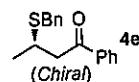

\*\* CALCULATION REPORT \*\*

| CH    | PKNO | TIME   | AREA    | HEIGHT | MK | IDNO | CONC    | NAME |
|-------|------|--------|---------|--------|----|------|---------|------|
| 1     | 26   | 13.86  | 6256930 | 408504 | SV |      | 95.0076 |      |
|       | 29   | 16.498 | 328787  | 17682  |    |      | 4.9924  |      |
| TOTAL |      |        | 6585717 | 426186 |    |      | 100     |      |

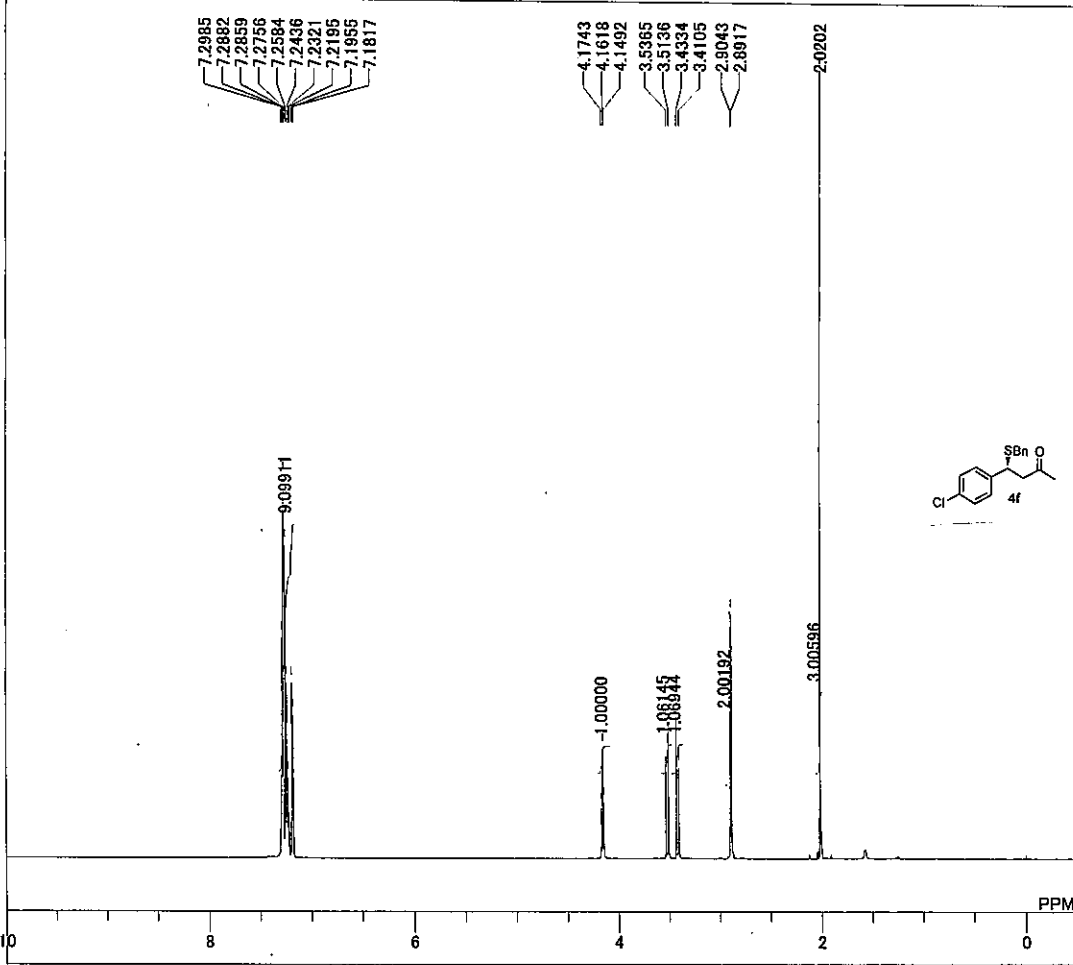

DFILE C:\Documents and Settings\delta\My D  
COMNT single\_pulse  
DATIM 15-02-2011 05:24:44  
OBNUC 1H  
EXMOD single\_pulse.ex2  
OBFRQ 600.17 MHz  
OBSET 5.30 KHz  
OBFIN 5.47 Hz  
POINT 13107  
FREQU 9008.87 Hz  
SCANS 8  
ACQTM 1.4549 sec  
PD 2.0000 sec  
PW1 6.50 usec  
IRNUC 1H  
CTEMP 18.0 c  
SLVNT CDCL3  
EXREF 0.00 ppm  
BF 0.12 Hz  
RGAIN 40

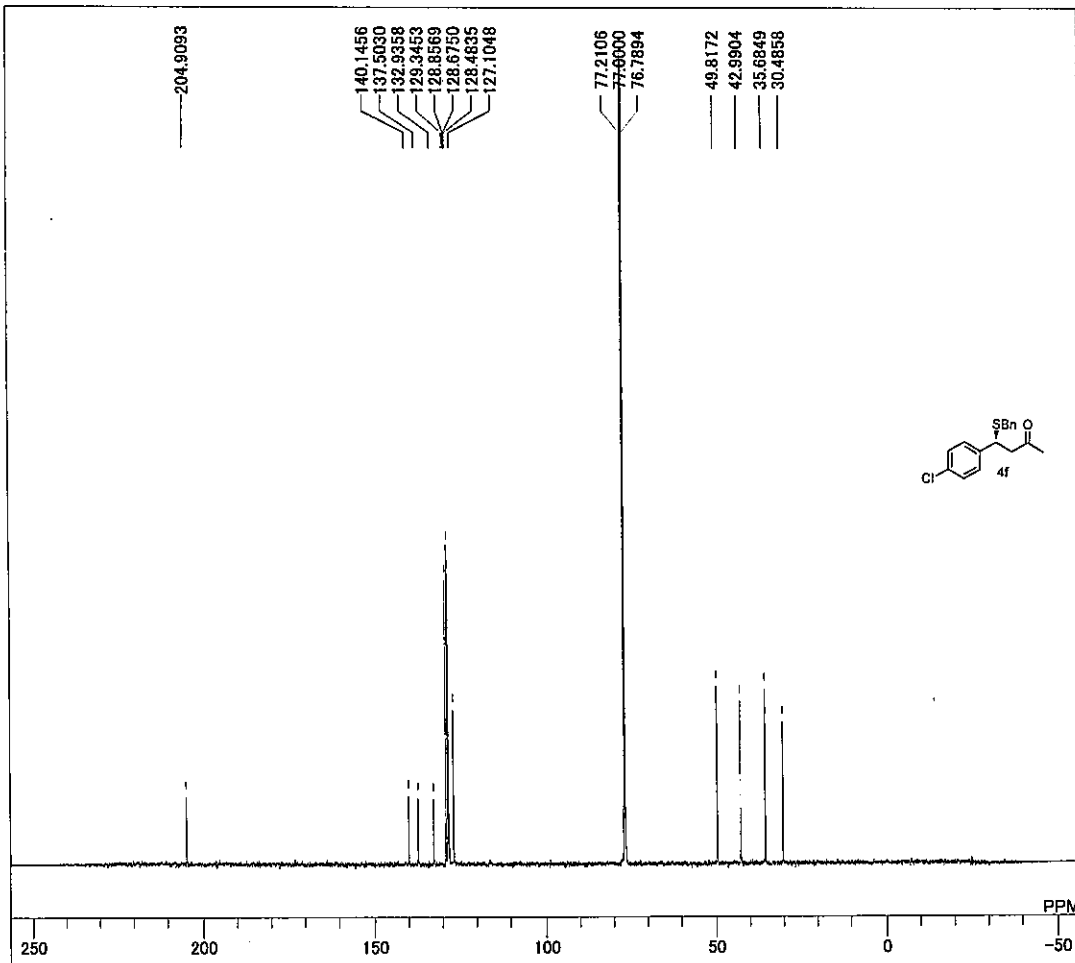

DFILE C:\Documents and Settings\delta\デスク  
COMNT 16-02-2011 09:51:12  
DATIM  
OBNUC 13C  
EXMOD single\_pulse\_dec  
OBFRQ 150.92 MHz  
OBSET 8.52 KHz  
OBFIN 1.74 Hz  
POINT 40961  
FREQU 59186.51 Hz  
SCANS 1024  
ACQTM 0.6921 sec  
PD 2.0000 sec  
PW1 2.87 usec  
IRNUC 1H  
CTEMP 19.2 c  
SLVNT CDCL3  
EXREF 77.00 ppm  
BF 0.12 Hz  
RGAIN 58

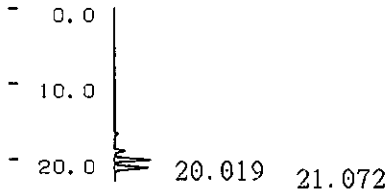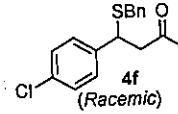

\*\* CALCULATION REPORT \*\*

| CH    | PKNO | TIME   | AREA   | HEIGHT | MK | IDNO | CONC    | NAME |
|-------|------|--------|--------|--------|----|------|---------|------|
| 1     | 51   | 20.019 | 422989 | 16888  | V  |      | 50.3544 |      |
|       | 52   | 21.072 | 417034 | 15733  | V  |      | 49.6455 |      |
| TOTAL |      |        | 840023 | 32621  |    |      | 100     |      |

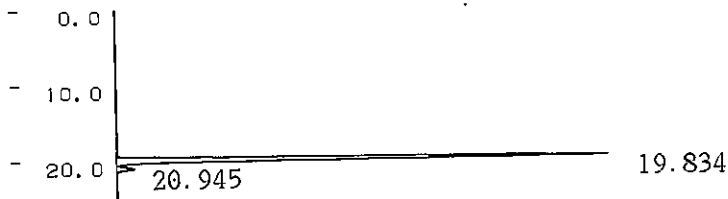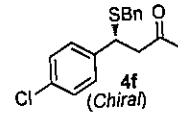

\*\* CALCULATION REPORT \*\*

| CH    | PKNO | TIME   | AREA    | HEIGHT | MK | IDNO | CONC    | NAME |
|-------|------|--------|---------|--------|----|------|---------|------|
| 1     | 37   | 19.834 | 6071240 | 236693 | V  |      | 96.2743 |      |
|       | 38   | 20.945 | 234947  | 8628   | V  |      | 3.7257  |      |
| TOTAL |      |        | 6306187 | 245320 |    |      | 100     |      |



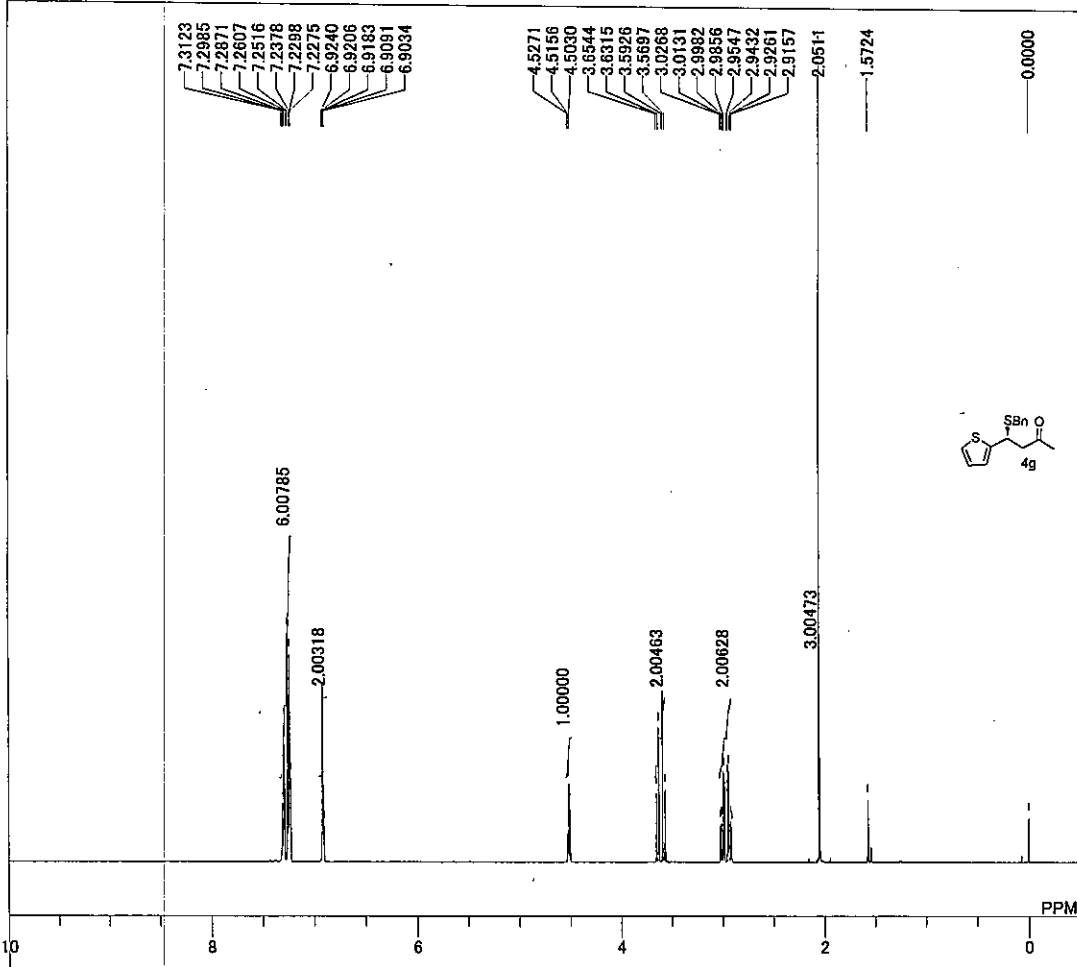

DFILE C:\Documents and Settings\delta\My D  
COMNT single\_pulse  
DATIM 16-02-2011 02:44:54  
OBNUC 1H  
EXMOD single\_pulse.ex2  
OBFRQ 600.17 MHz  
OBSET 5.30 KHz  
OBFIN 5.47 Hz  
POINT 13107  
FREQU 9008.87 Hz  
SCANS 8  
ACQTM 1.4549 sec  
PD 2.0000 sec  
PWI 6.50 usec  
IRNUC 1H  
CTEMP 17.8 c  
SLVNT CDCL3  
EXREF 0.00 ppm  
BF 0.12 Hz  
RGAIN 42

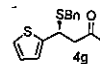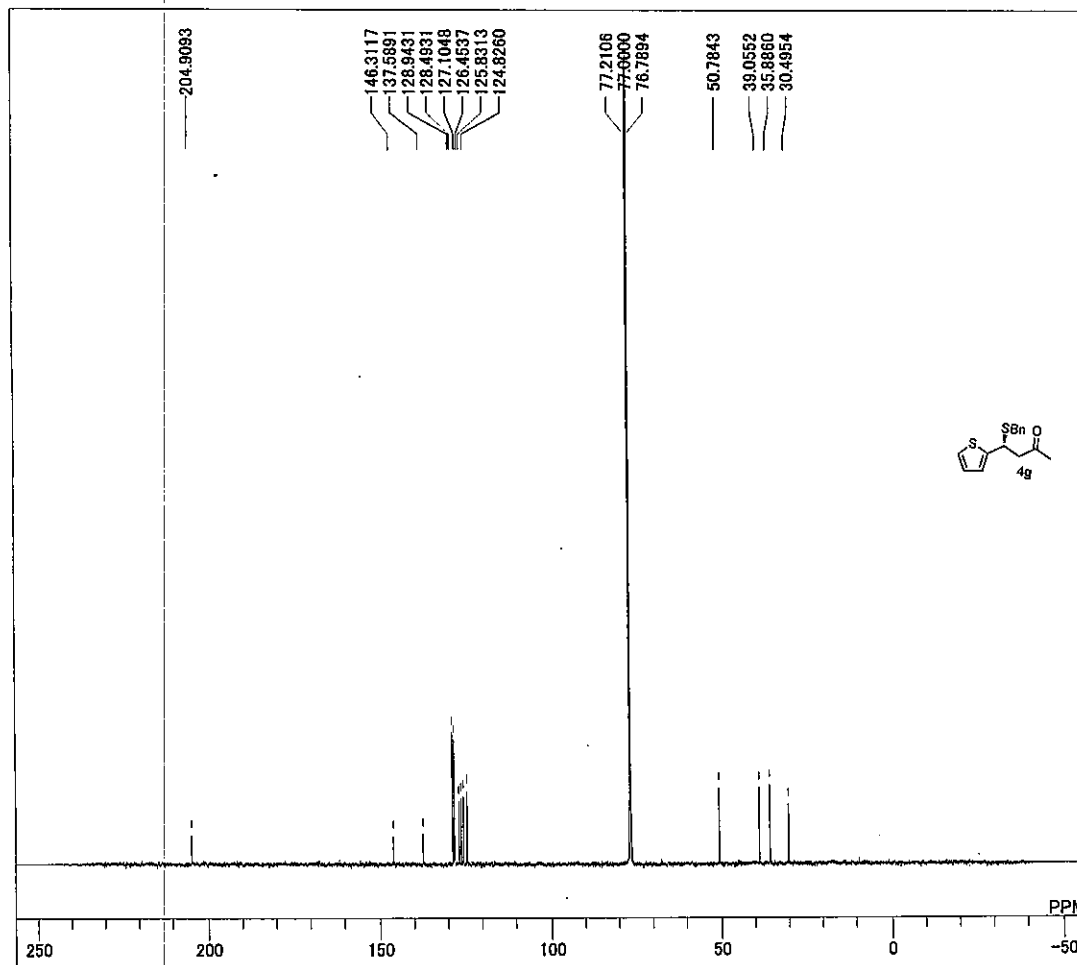

DFILE C:\Documents and Settings\delta\My D  
COMNT single\_pulse\_dec  
DATIM 16-02-2011 13:28:06  
OBNUC 13C  
EXMOD single\_pulse\_dec  
OBFRQ 150.92 MHz  
OBSET 8.52 KHz  
OBFIN 1.74 Hz  
POINT 40961  
FREQU 59186.51 Hz  
SCANS 1024  
ACQTM 0.6921 sec  
PD 2.0000 sec  
PWI 2.87 usec  
IRNUC 1H  
CTEMP 19.8 c  
SLVNT CDCL3  
EXREF 77.00 ppm  
BF 0.12 Hz  
RGAIN 60

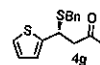

Analysis FILE : 9:@FIL15.FIL

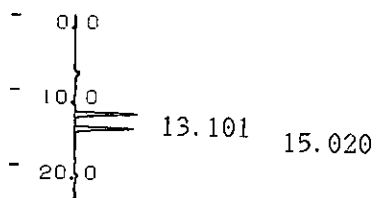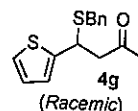

\*\* CALCULATION REPORT \*\*

| CH    | PKNO | TIME   | AREA   | HEIGHT | MK | IDNO | CONC    | NAME |
|-------|------|--------|--------|--------|----|------|---------|------|
| 1     | 7    | 13.101 | 83705  | 3770   |    |      | 50.4681 |      |
|       | 8    | 15.02  | 82152  | 3498   |    |      | 49.5319 |      |
| TOTAL |      |        | 165857 | 7268   |    |      | 100     |      |

C-RSA CHROMATOPAC CH=1 Report No.=6

DATA=1:@CHRM1.C00 11/02/17 23:13:42

Analysis FILE : 9:@FIL15.FIL

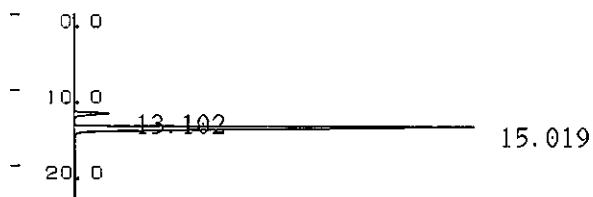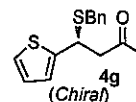

\*\* CALCULATION REPORT \*\*

| CH    | PKNO | TIME   | AREA    | HEIGHT | MK | IDNO | CONC    | NAME |
|-------|------|--------|---------|--------|----|------|---------|------|
| 1     | 7    | 13.102 | 91986   | 4153   | V  |      | 7.4834  |      |
|       | 8    | 15.019 | 1137222 | 48247  | S  |      | 92.5166 |      |
| TOTAL |      |        | 1229208 | 52400  |    |      | 100     |      |

C-RSA CHROMATOPAC CH=1 Report No.=9

DATA=1:@CHRM1.C00 11/02/17 23:40:30

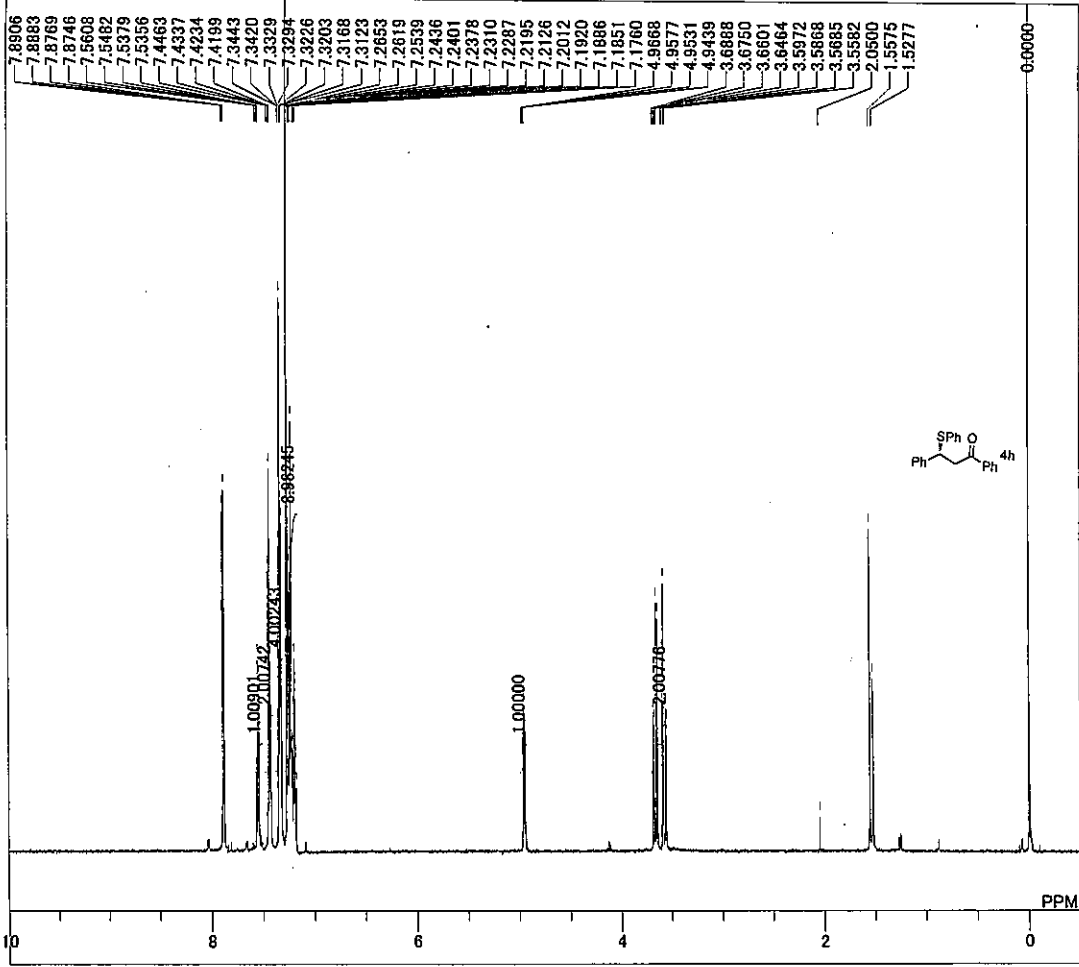

DFILE  
COMNT  
DATIM 10-02-2011 02:17:38  
OBNUC 1H  
EXMOD single\_pulse.ex2  
OBFRQ 600.17 MHz  
OBSET 5.30 KHz  
OBFIN 5.47 Hz  
POINT 13107  
FREQU 9008.87 Hz  
SCANS 8  
ACQTM 1.4549 sec  
PD 2.0000 sec  
PW1 6.50 usec  
IRNUC 1H  
CTEMP 18.3 c  
SLVNT CDCL3  
EXREF 0.00 ppm  
BF 0.12 Hz  
RGAIN 44

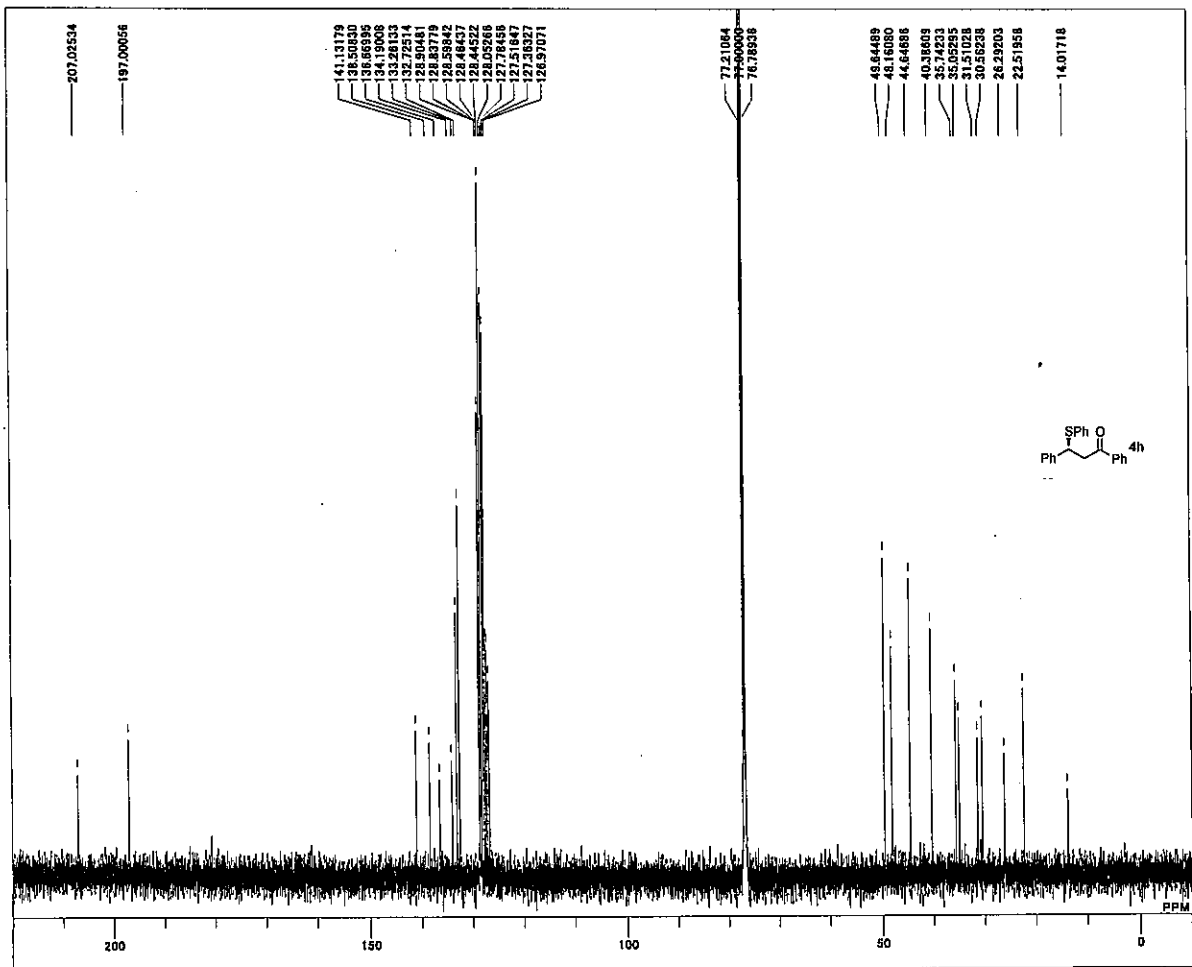

DFILE  
COMNT  
DATIM 18-02-2011 17:36:05  
OBNUC 13C  
EXMOD single\_pulse.dec  
OBFRQ 150.92 MHz  
OBSET 8.52 KHz  
OBFIN 1.74 Hz  
POINT 32768  
FREQU 47348.49 Hz  
SCANS 9999  
ACQTM -0.8821 sec  
PD 2.0000 sec  
PW1 2.87 usec  
IRNUC 1H  
CTEMP 19.0 o  
SLVNT CDCL3  
EXREF 77.00 ppm  
BF 0.12 Hz  
RGAIN 80

Analysis FILE : 9:@FIL15.FIL

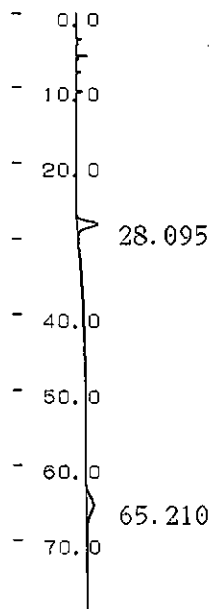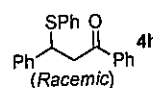

\*\* CALCULATION REPORT \*\*

| CH    | PKNO | TIME   | AREA   | HEIGHT | MK | IDNO | CONC    | NAME |
|-------|------|--------|--------|--------|----|------|---------|------|
| 1     | 18   | 28.095 | 147114 | 2467   |    |      | 50.0568 |      |
|       | 20   | 65.21  | 146780 | 853    |    |      | 49.9432 |      |
| TOTAL |      |        | 293893 | 3320   |    |      | 100     |      |

C-RSA CHROMATOPAC CH=1 Report No.=14 DATA=1:@CHRM1.C00 11/02/18 22:05:44

Analysis FILE : 9:@FIL15.FIL

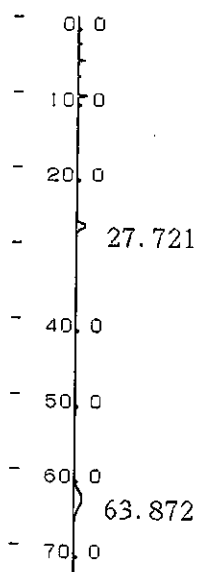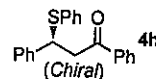

\*\* CALCULATION REPORT \*\*

| CH    | PKNO | TIME   | AREA   | HEIGHT | MK | IDNO | CONC    | NAME |
|-------|------|--------|--------|--------|----|------|---------|------|
| 1     | 17   | 27.721 | 140865 | 2402   |    |      | 29.5719 |      |
|       | 22   | 63.872 | 335483 | 2019   |    |      | 70.4281 |      |
| TOTAL |      |        | 476349 | 4421   |    |      | 100     |      |

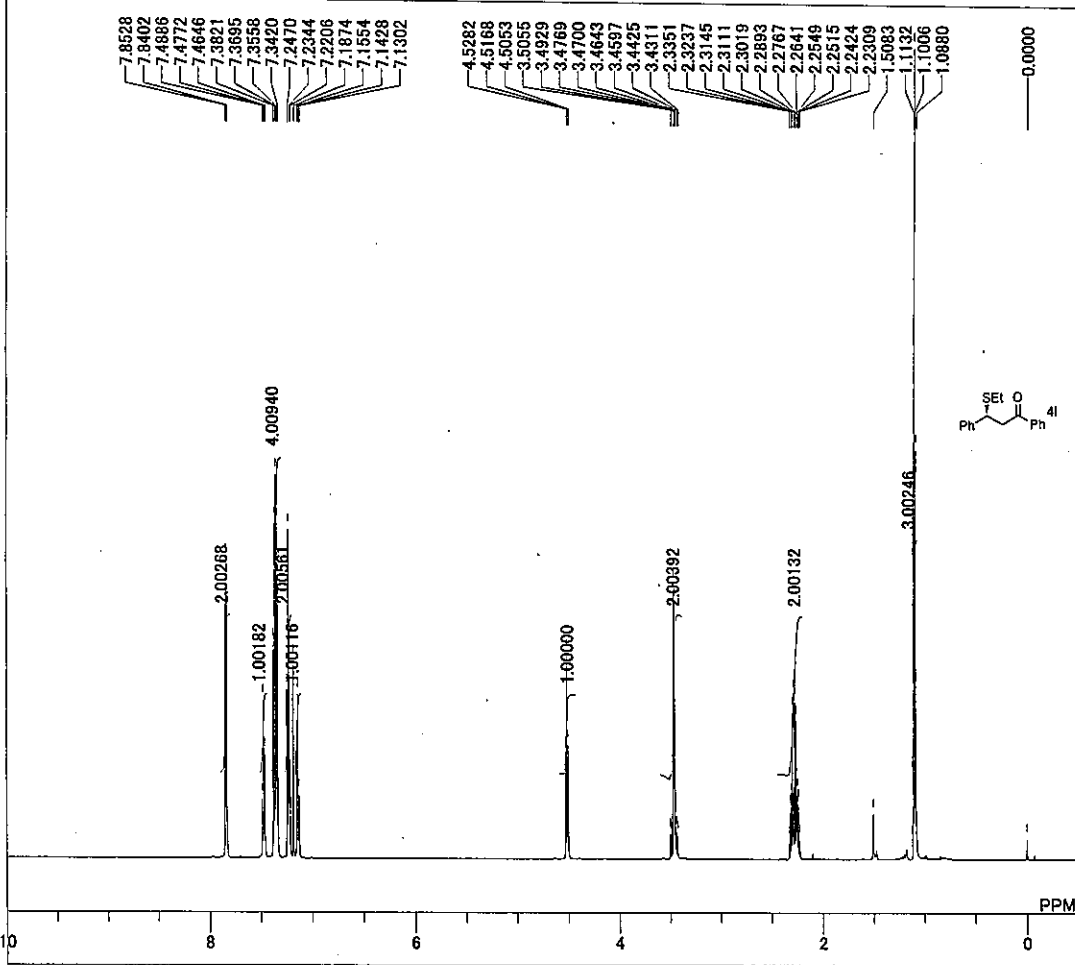

DFILE  
COMNT  
DATIM 18-02-2011 08:40:50  
OBNUC 1H  
EXMOD single\_pulse.ex2  
OBFRQ 600.17 MHz  
OBSET 5.30 KHz  
OBFIN 5.47 Hz  
POINT 16384  
FREQU 11261.26 Hz  
SCANS 20  
ACQTM 1.4549 sec  
PD 2.0000 sec  
PW1 6.50 usec  
IRNUC 1H  
CTEMP 18.2 c  
SLVNT CDCL3  
EXREF 0.00 ppm  
BF 0.12 Hz  
RGAIN 42

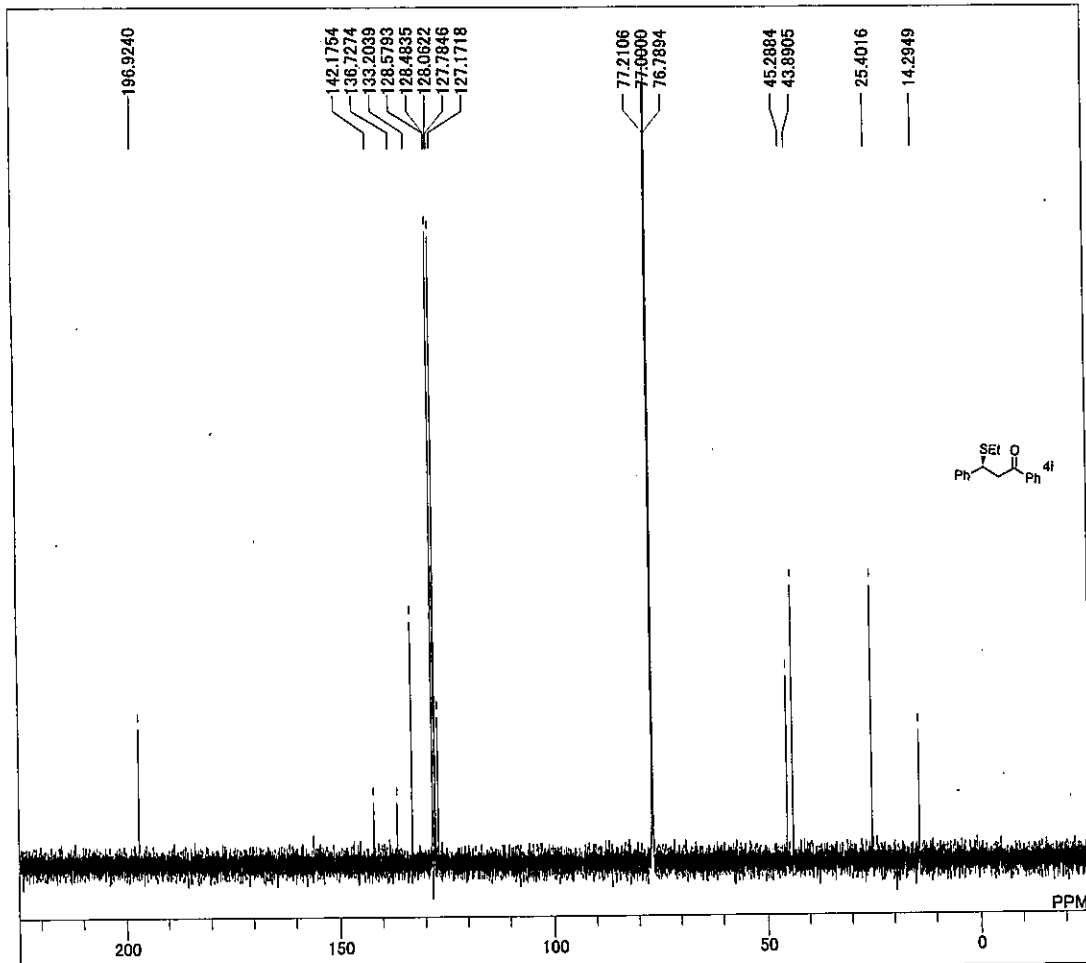

DFILE  
COMNT  
DATIM 18-02-2011 05:16:43  
OBNUC 13C  
EXMOD single\_pulse\_dec  
OBFRQ 150.92 MHz  
OBSET 8.52 KHz  
OBFIN 1.74 Hz  
POINT 32768  
FREQU 47348.49 Hz  
SCANS 140  
ACQTM 0.6921 sec  
PD 2.0000 sec  
PW1 2.87 usec  
IRNUC 1H  
CTEMP 18.8 c  
SLVNT CDCL3  
EXREF 77.00 ppm  
BF 0.12 Hz  
RGAIN 60

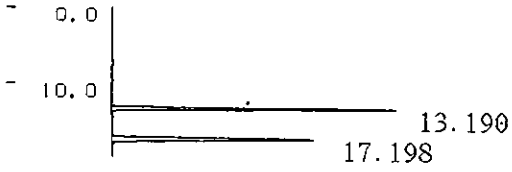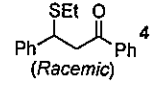

\*\* CALCULATION REPORT \*\*

| CH    | PKNO | TIME   | AREA    | HEIGHT | MK | IDNO | CONC    | NAME |
|-------|------|--------|---------|--------|----|------|---------|------|
| 1     | 21   | 13.19  | 2073155 | 136578 | SV |      | 50.0061 |      |
|       | 24   | 17.198 | 2072652 | 94134  |    |      | 49.9939 |      |
| TOTAL |      |        | 4145808 | 230712 |    |      | 100     |      |

Analysis FILE : 9:@FIL15.FIL

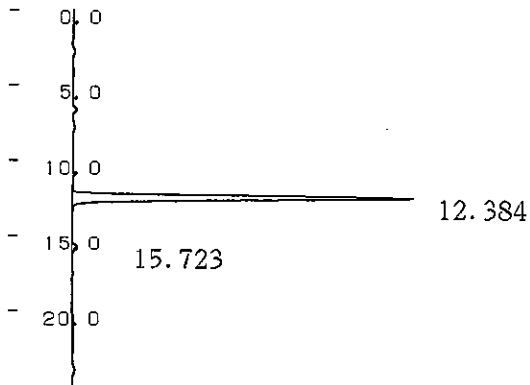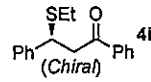

\*\* CALCULATION REPORT \*\*

| CH    | PKNO | TIME   | AREA   | HEIGHT | MK | IDNO | CONC  | NAME |
|-------|------|--------|--------|--------|----|------|-------|------|
| 1     | 10   | 12.384 | 415088 | 20565  |    |      | 98.13 |      |
|       | 12   | 15.723 | 7910   | 324    | V  |      | 1.87  |      |
| TOTAL |      |        | 422999 | 20889  |    |      | 100   |      |

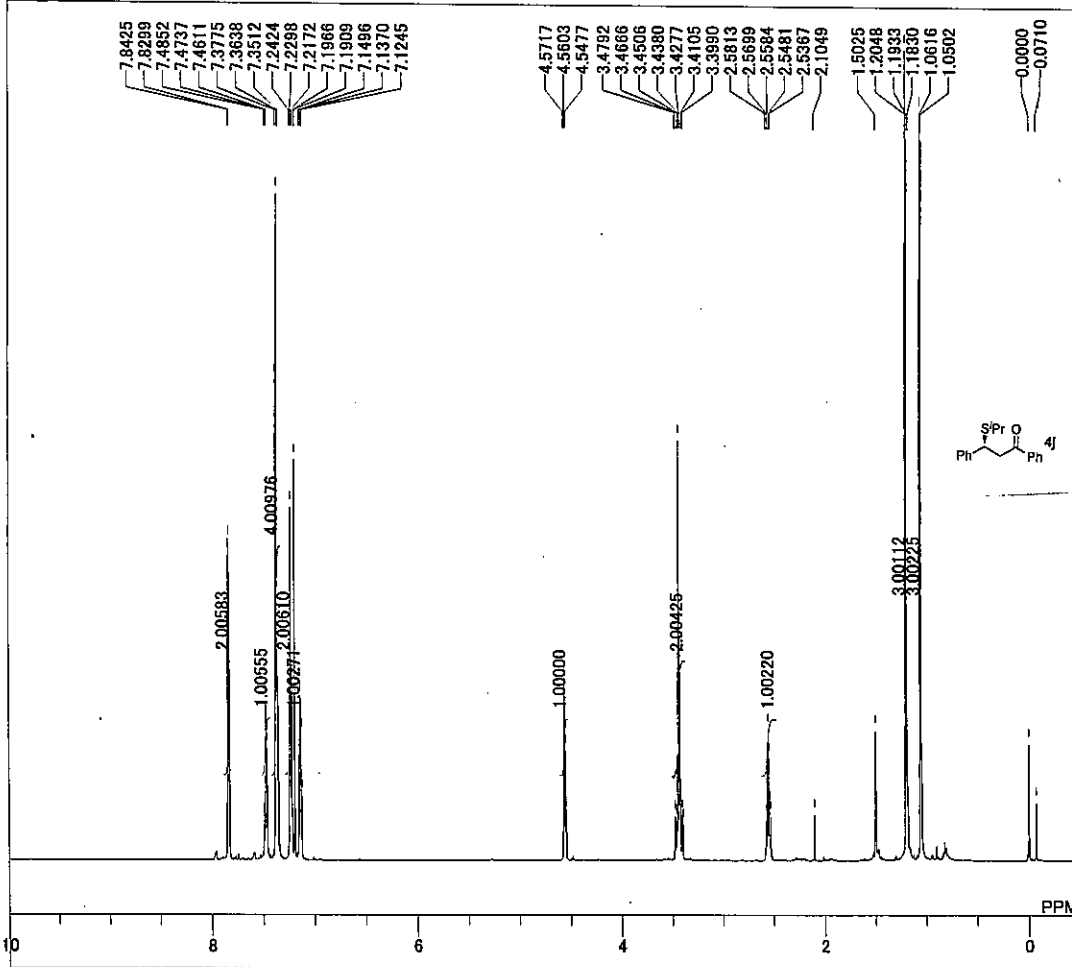

DFILE  
COMNT  
DATIM 18-02-2011 08:51:22  
OBNUC 1H  
EXMOD single\_pulse.ex2  
OBFRQ 600.17 MHz  
OBSET 5.30 KHz  
OBFIN 5.47 Hz  
POINT 16384  
FREQU 11261.26 Hz  
SCANS 24  
ACQTM 1.4549 sec  
PD 2.0000 sec  
PWI 6.50 usec  
IRNUC 1H  
CTEMP 17.9 c  
SLVNT CDCL3  
EXREF 0.00 ppm  
BF 0.12 Hz  
RGAIN 42

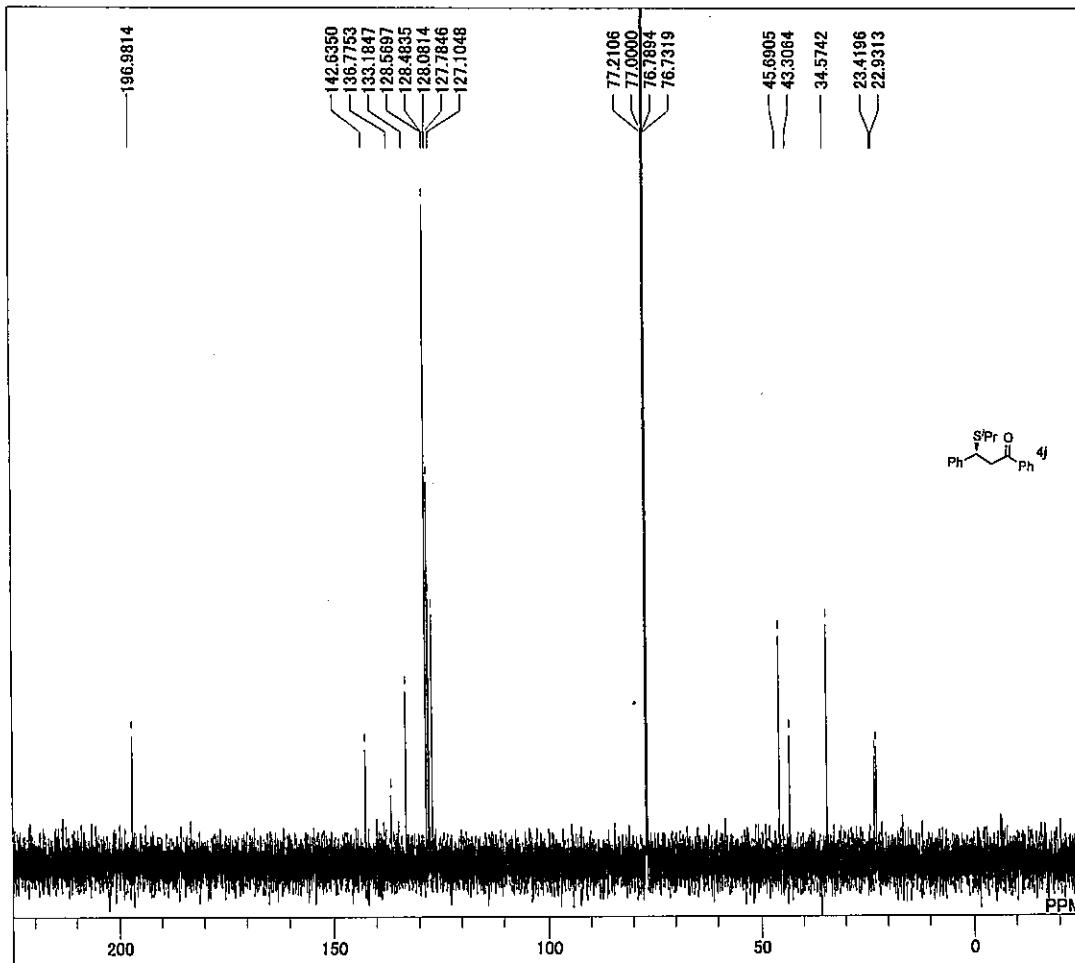

DFILE  
COMNT  
DATIM 18-02-2011 09:02:55  
OBNUC 13C  
EXMOD single\_pulse\_dec  
OBFRQ 150.92 MHz  
OBSET 8.52 KHz  
OBFIN 1.74 Hz  
POINT 32768  
FREQU 47348.49 Hz  
SCANS 205  
ACQTM 0.6921 sec  
PD 2.0000 sec  
PWI 2.87 usec  
IRNUC 1H  
CTEMP 19.3 c  
SLVNT CDCL3  
EXREF 77.00 ppm  
BF 0.12 Hz  
RGAIN 60

C-RSA CHROMATOPAC CH=1 Report No.=3

DATA=1:@CHRM1.C00 11/02/22 18:54:24

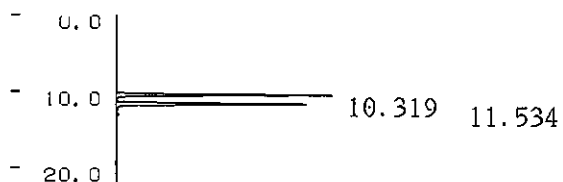

\*\* CALCULATION REPORT \*\*

| CH    | PKNO | TIME   | AREA     | HEIGHT | MK | IDNO | CONC    | NAME |
|-------|------|--------|----------|--------|----|------|---------|------|
| 1     | 7    | 10.319 | 5255850  | 414441 | V  |      | 49.5586 |      |
|       | 8    | 11.534 | 5349472  | 364825 | V  |      | 50.4414 |      |
| TOTAL |      |        | 10605321 | 779266 |    |      | 100     |      |

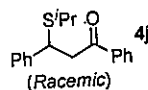

C-RSA CHROMATOPAC CH=1 Report No.=16

DATA=1:@CHRM1.C00 11/02/20 20:50:18

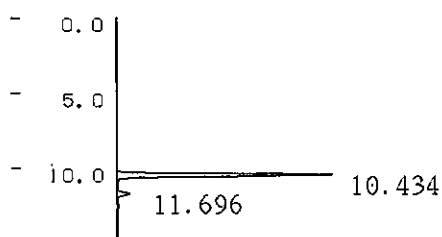

\*\* CALCULATION REPORT \*\*

| CH    | PKNO | TIME   | AREA     | HEIGHT | MK | IDNO | CONC    | NAME |
|-------|------|--------|----------|--------|----|------|---------|------|
| 1     | 28   | 10.434 | 10502692 | 825966 |    |      | 92.9622 |      |
|       | 29   | 11.696 | 795121   | 47475  | V  |      | 7.0378  |      |
| TOTAL |      |        | 11297812 | 873441 |    |      | 100     |      |

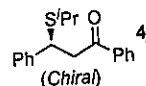



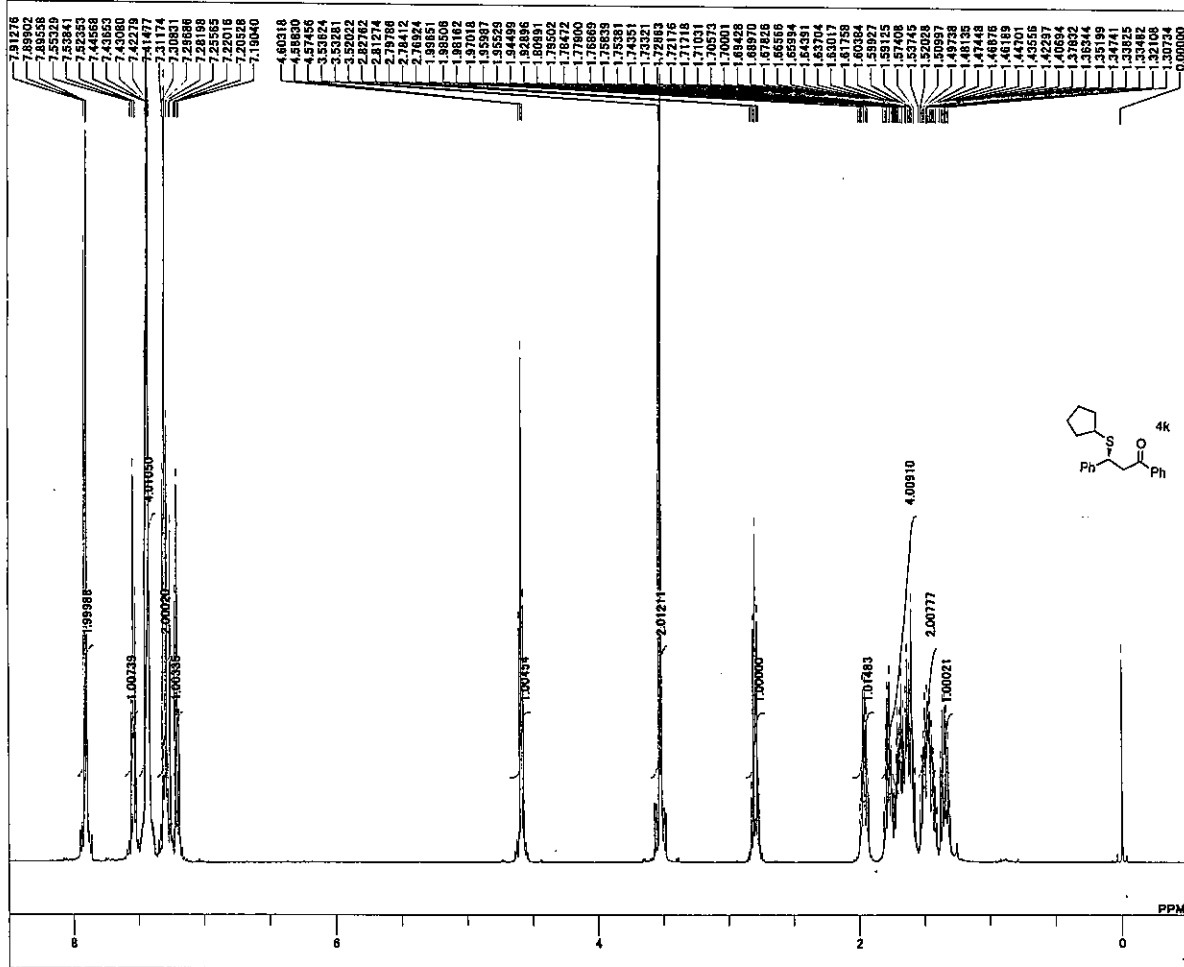

DFILE C:\Documents and Settings\VALICE2\Desktop\1498-H  
COMNT 1498-H  
DATIM 18-02-2011 13:55:55  
OBNUC 1H  
EXMOD 1H NMR.ex2  
OBFRQ 495.13 MHz  
OBSET 4.38 KHz  
OBFIN 9.64 Hz  
POINT 18384  
FREQU 9286.78 Hz  
SCANS 8  
ACQTM 1.7842 sec  
PD 5.0000 sec  
PWI 5.80 usec  
IRNUC 1H  
CTEMP 18.4 c  
SLVNT CDCL3  
EXREF 0.00 ppm  
BF 0.12 Hz  
RGAIN 36

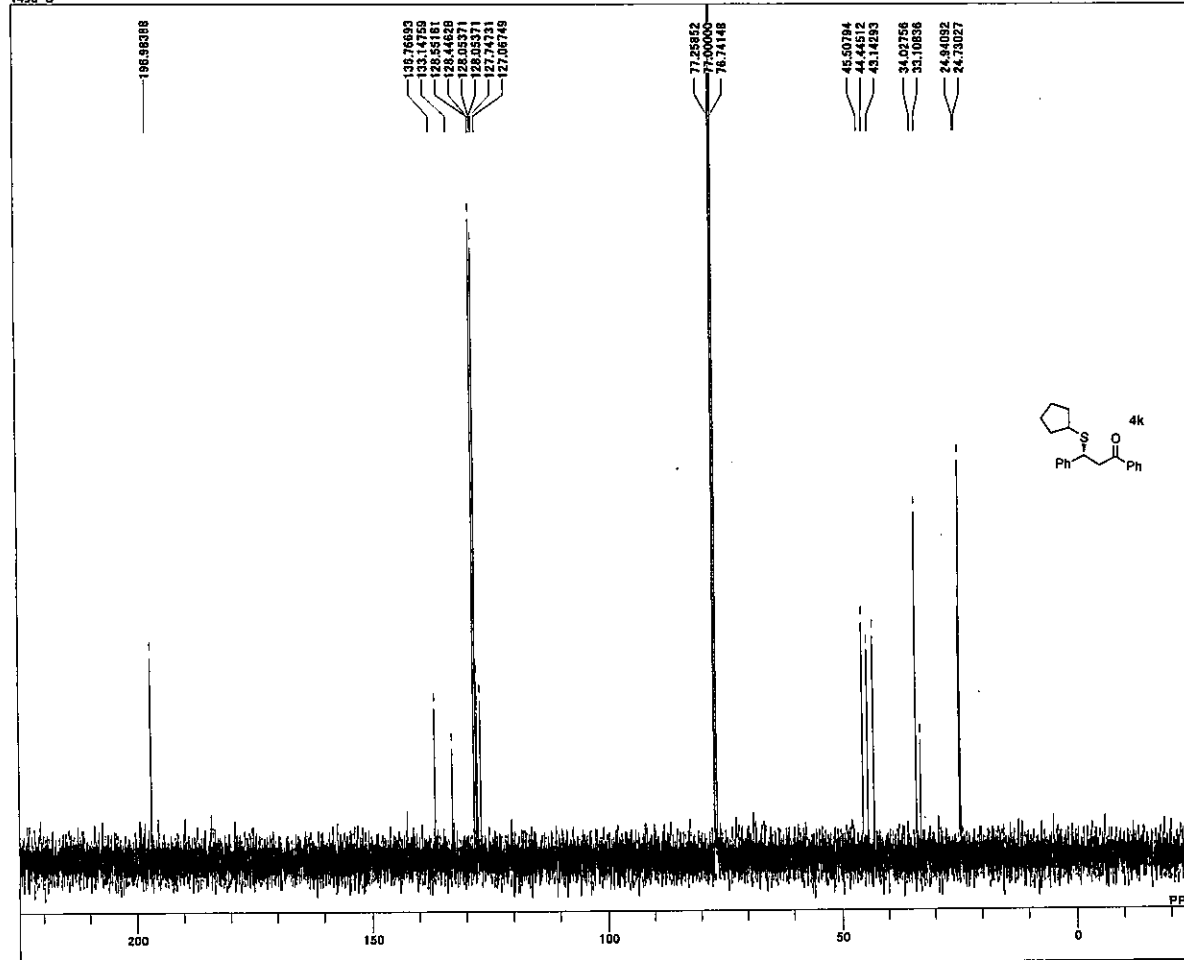

DFILE C:\Documents and Settings\VALICE2\Desktop\1498-C  
COMNT 1498-C  
DATIM 18-02-2011 14:12:09  
OBNUC 13C  
EXMOD 13C NMR.ex2  
OBFRQ 124.51 MHz  
OBSET 3.45 KHz  
OBFIN 6.00 Hz  
POINT 32768  
FREQU 39082.50 Hz  
SCANS 313  
ACQTM 0.8389 sec  
PD 2.0000 sec  
PWI 3.67 usec  
IRNUC 1H  
CTEMP 18.8 c  
SLVNT CDCL3  
EXREF 77.00 ppm  
BF 0.12 Hz  
RGAIN 80

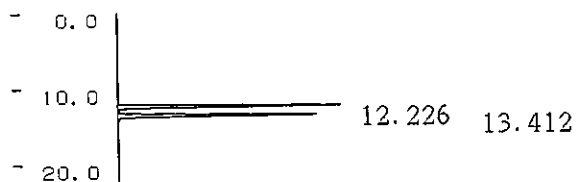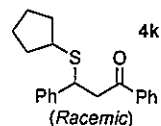

\*\* CALCULATION REPORT \*\*

| CH    | PKNO | TIME   | AREA     | HEIGHT | MK | IDNO | CONC    | NAME |
|-------|------|--------|----------|--------|----|------|---------|------|
| 1     | 25   | 12.226 | 6608326  | 426840 |    |      | 49.8485 |      |
|       | 26   | 13.412 | 6648489  | 378299 | SV |      | 50.1515 |      |
| TOTAL |      |        | 13256815 | 805139 |    |      | 100     |      |

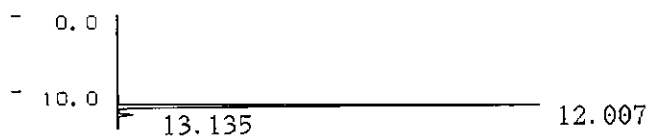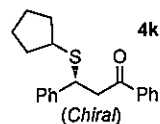

\*\* CALCULATION REPORT \*\*

| CH    | PKNO | TIME   | AREA     | HEIGHT | MK | IDNO | CONC    | NAME |
|-------|------|--------|----------|--------|----|------|---------|------|
| 1     | 32   | 12.007 | 12472128 | 813145 |    |      | 96.3274 |      |
|       | 33   | 13.135 | 475520   | 27400  | SV |      | 3.6726  |      |
| TOTAL |      |        | 12947648 | 840545 |    |      | 100     |      |

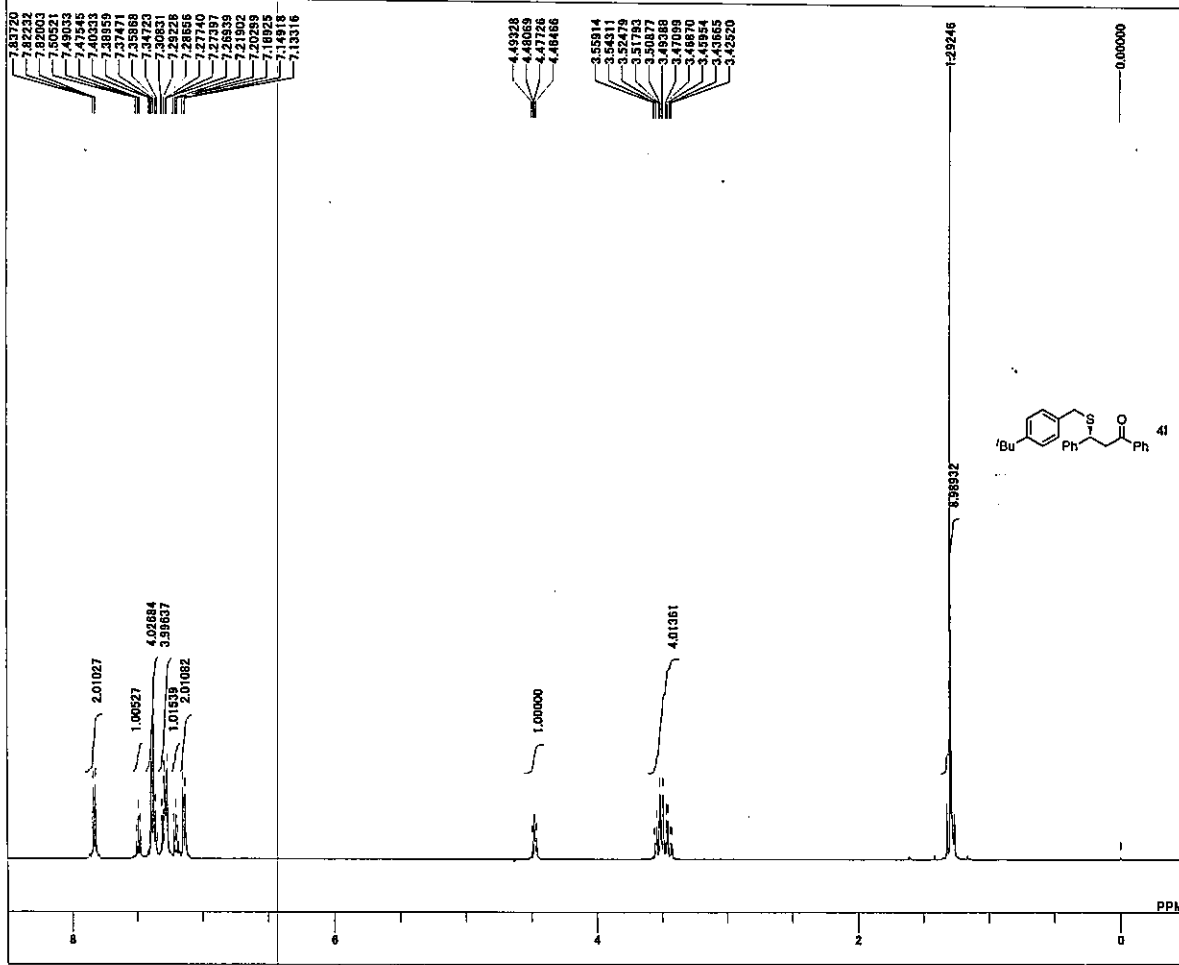

DFILE C:\Documents and Settings\VAI Users\Doc  
COMNT 312-H  
DATIM 18-02-2011 15:25:51  
OBNUC 1H  
EXMOD 1H NMR.ex2  
OBFRQ 495.13 MHz  
OBSET 4.38 KHz  
OBFIN 9.64 Hz  
POINT 13107  
FREQU 7429.31 Hz  
SCANS 8  
ACQTM 1.7642 sec  
PD 5.0000 sec  
PWT 5.80 usec  
IRNUC 1H  
CTEMP 18.4 c  
SLVNT CDCL3  
EXREF 0.00 ppm  
BF 0.12 Hz  
RGAIN 28

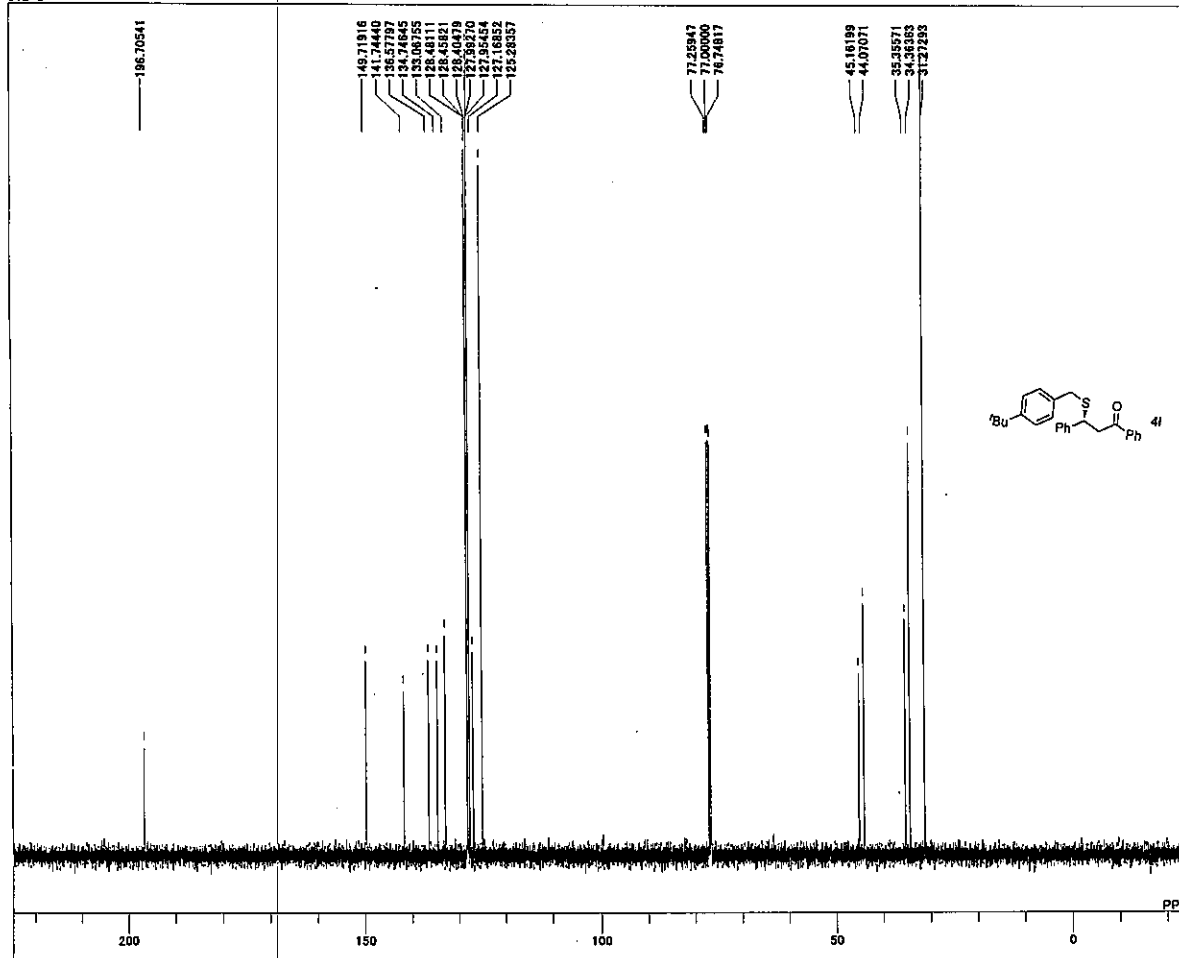

DFILE C:\Documents and Settings\VAI Users\Doc  
COMNT 312-C  
DATIM 18-02-2011 15:48:17  
OBNUC 13C  
EXMOD 13C NMR.ex2  
OBFRQ 124.51 MHz  
OBSET 3.45 KHz  
OBFIN 6.00 Hz  
POINT 32768  
FREQU 31133.25 Hz  
SCANS 421  
ACQTM 1.0525 sec  
PD 2.0000 sec  
PWT 3.87 usec  
IRNUC 1H  
CTEMP 18.8 c  
SLVNT CDCL3  
EXREF 77.00 ppm  
BF 0.12 Hz  
RGAIN 76

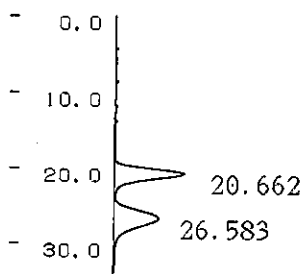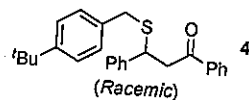

## \*\* CALCULATION REPORT \*\*

| CH    | PKNO | TIME   | AREA    | HEIGHT | MK | IDNO | CONC    | NAME |
|-------|------|--------|---------|--------|----|------|---------|------|
| 1     | 31   | 20.662 | 1720426 | 16806  | V  |      | 49.9637 |      |
|       | 32   | 26.583 | 1722927 | 10783  | V  |      | 50.0363 |      |
| TOTAL |      |        | 3443353 | 27589  |    |      | 100     |      |

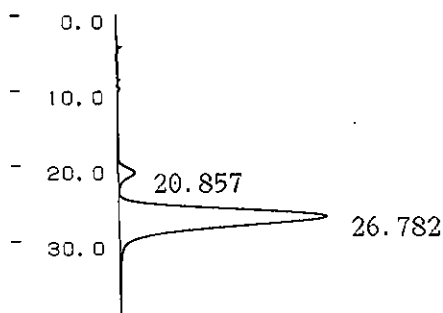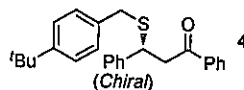

## \*\* CALCULATION REPORT \*\*

| CH    | PKNO | TIME   | AREA     | HEIGHT | MK | IDNO | CONC    | NAME |
|-------|------|--------|----------|--------|----|------|---------|------|
| 1     | 26   | 20.857 | 827362   | 7856   |    |      | 4.7947  |      |
|       | 27   | 26.782 | 16428209 | 99764  | V  |      | 95.2052 |      |
| TOTAL |      |        | 17255568 | 107620 |    |      | 100     |      |

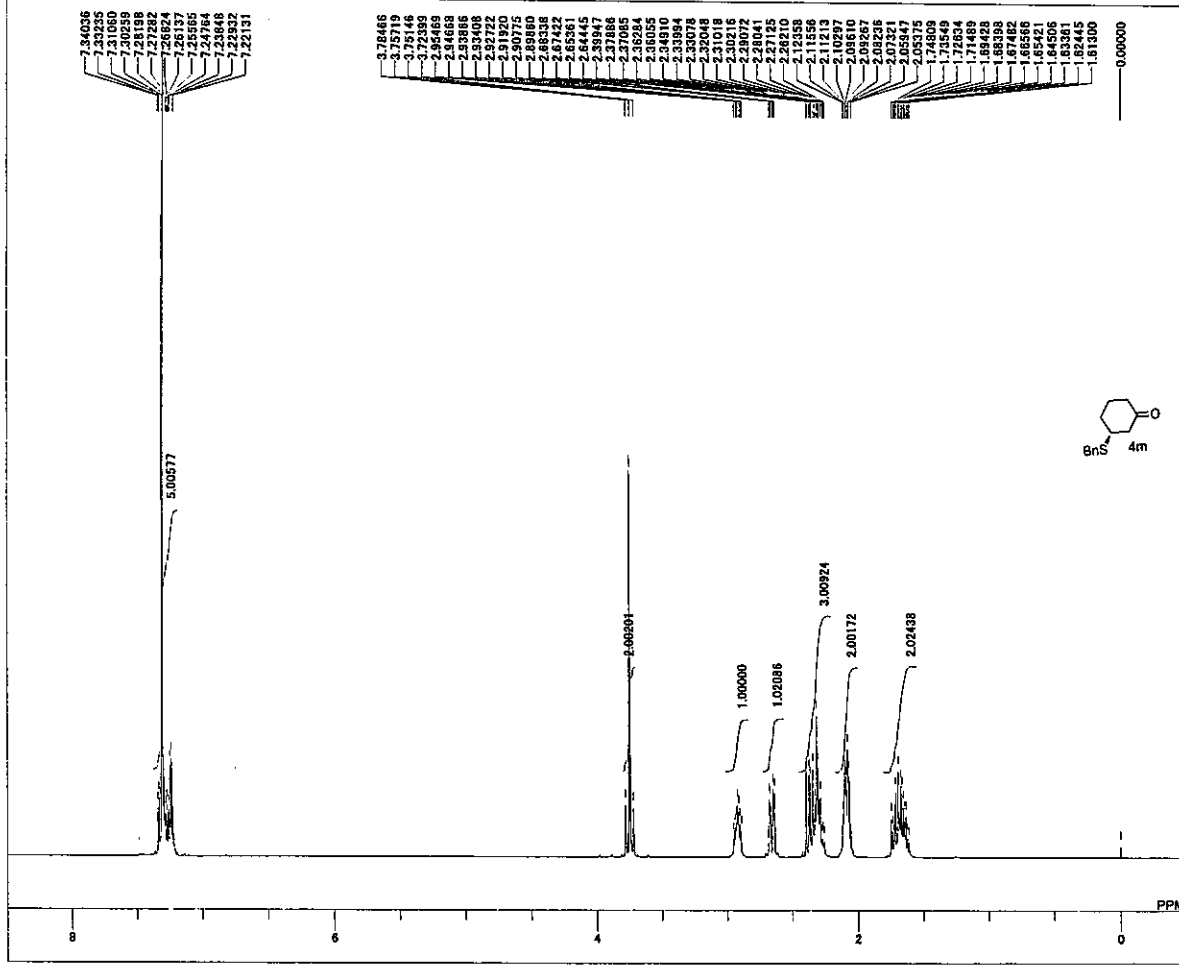

DFILE C:\Documents and Settings\VALICE2\Desktop\1495-H-1.jdf  
COMNT 1495-H  
DATIM 17-02-2011 17:34:41  
OBNUC 1H  
EXMOD 1H NMR.ex2  
OBFRQ 495.13 MHz  
OBSET 4.38 KHz  
OBFIN 9.64 Hz  
POINT 18384  
FREQU 9286.78 Hz  
SCANS 8  
ACQTM 1.7642 sec  
PD 5.0000 sec  
PWI 5.80 usec  
IRNUC 1H  
CTEMP 18.2 c  
SLVNT CDCL3  
EXREF 0.00 ppm  
BF 0.12 Hz  
RGAIN 32

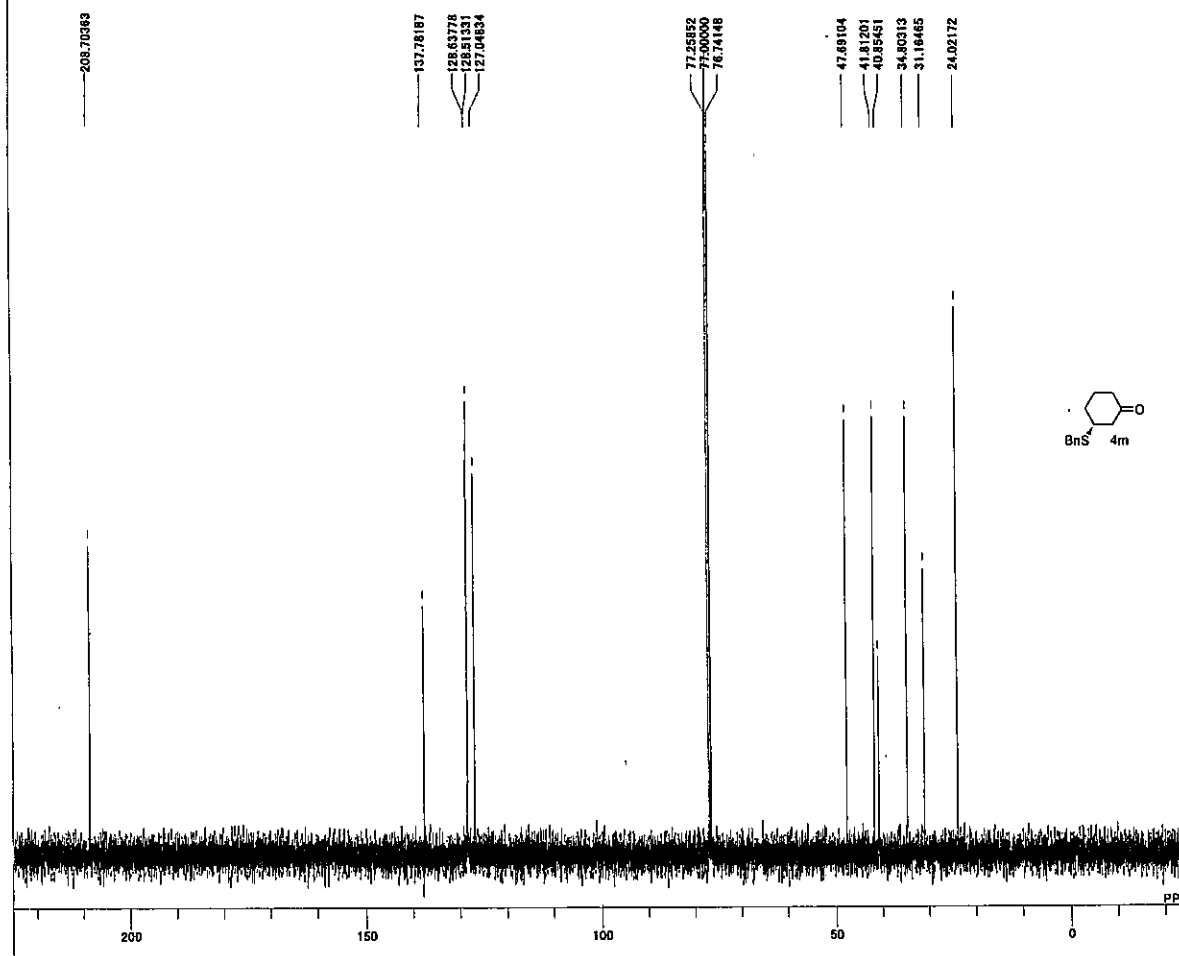

DFILE C:\Documents and Settings\VALICE2\Desktop\1495-C-1.jdf  
COMNT 1495-C  
DATIM 17-02-2011 17:42:20  
OBNUC 13C  
EXMOD 13C NMR.ex2  
OBFRQ 124.51 MHz  
OBSET 3.45 KHz  
OBFIN 6.00 Hz  
POINT 32788  
FREQU 39882.50 Hz  
SCANS 145  
ACQTM 0.8389 sec  
PD 2.0000 sec  
PWI 3.67 usec  
IRNUC 1H  
CTEMP 18.8 c  
SLVNT CDCL3  
EXREF 77.00 ppm  
BF 0.12 Hz  
RGAIN 60

C-RSA CHROMATOPAC CH=1 Report No.=1

DATA=1:@CHRM1.C00 11/02/17 22:31:34

Analysis FILE : 9:@FIL15.FIL

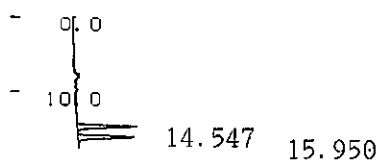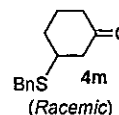

\*\* CALCULATION REPORT \*\*

| CH    | PKNO | TIME   | AREA  | HEIGHT | MK | IDNO | CONC    | NAME |
|-------|------|--------|-------|--------|----|------|---------|------|
| 1     | 9    | 14.547 | 39964 | 1776   |    |      | 49.7715 |      |
|       | 10   | 15.95  | 40331 | 1686   |    |      | 50.2285 |      |
| TOTAL |      |        | 80295 | 3462   |    |      | 100     |      |

C-RSA CHROMATOPAC CH=1 Report No.=2

DATA=1:@CHRM1.C00 11/02/17 22:31:34

Analysis FILE : 9:@FIL15.FIL

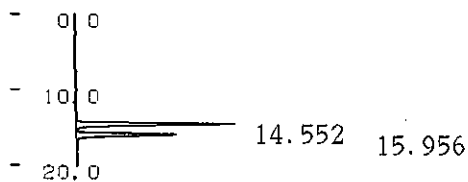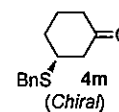

\*\* CALCULATION REPORT \*\*

| CH    | PKNO | TIME   | AREA   | HEIGHT | MK | IDNO | CONC    | NAME |
|-------|------|--------|--------|--------|----|------|---------|------|
| 1     | 10   | 14.552 | 216133 | 9499   |    |      | 59.9071 |      |
|       | 11   | 15.956 | 144647 | 6027   | V  |      | 40.0929 |      |
| TOTAL |      |        | 360779 | 15526  |    |      | 100     |      |

C-RSA CHROMATOPAC CH=1 Report No.=4

DATA=1:@CHRM1.C00 11/02/17 22:50:24
